# Supplementary material for: Sufu- and Spop-mediated downregulation of Hedgehog signaling promotes beta cell differentiation through organ-specific niche signals
Source: PubMed Central journal article supplement (PMC6789033; doi:10.1038/s41467-019-12624-5), 2019-10-11
Supplement: 41467_2019_12624_MOESM1_ESM.pdf [file 41467_2019_12624_MOESM1_ESM.pdf]

## **Supplementary Information**

**Sufu and Spop mediated Hedgehog signaling promotes beta cell differentiation through organ specific niche signals**

Yung and Poon et al.

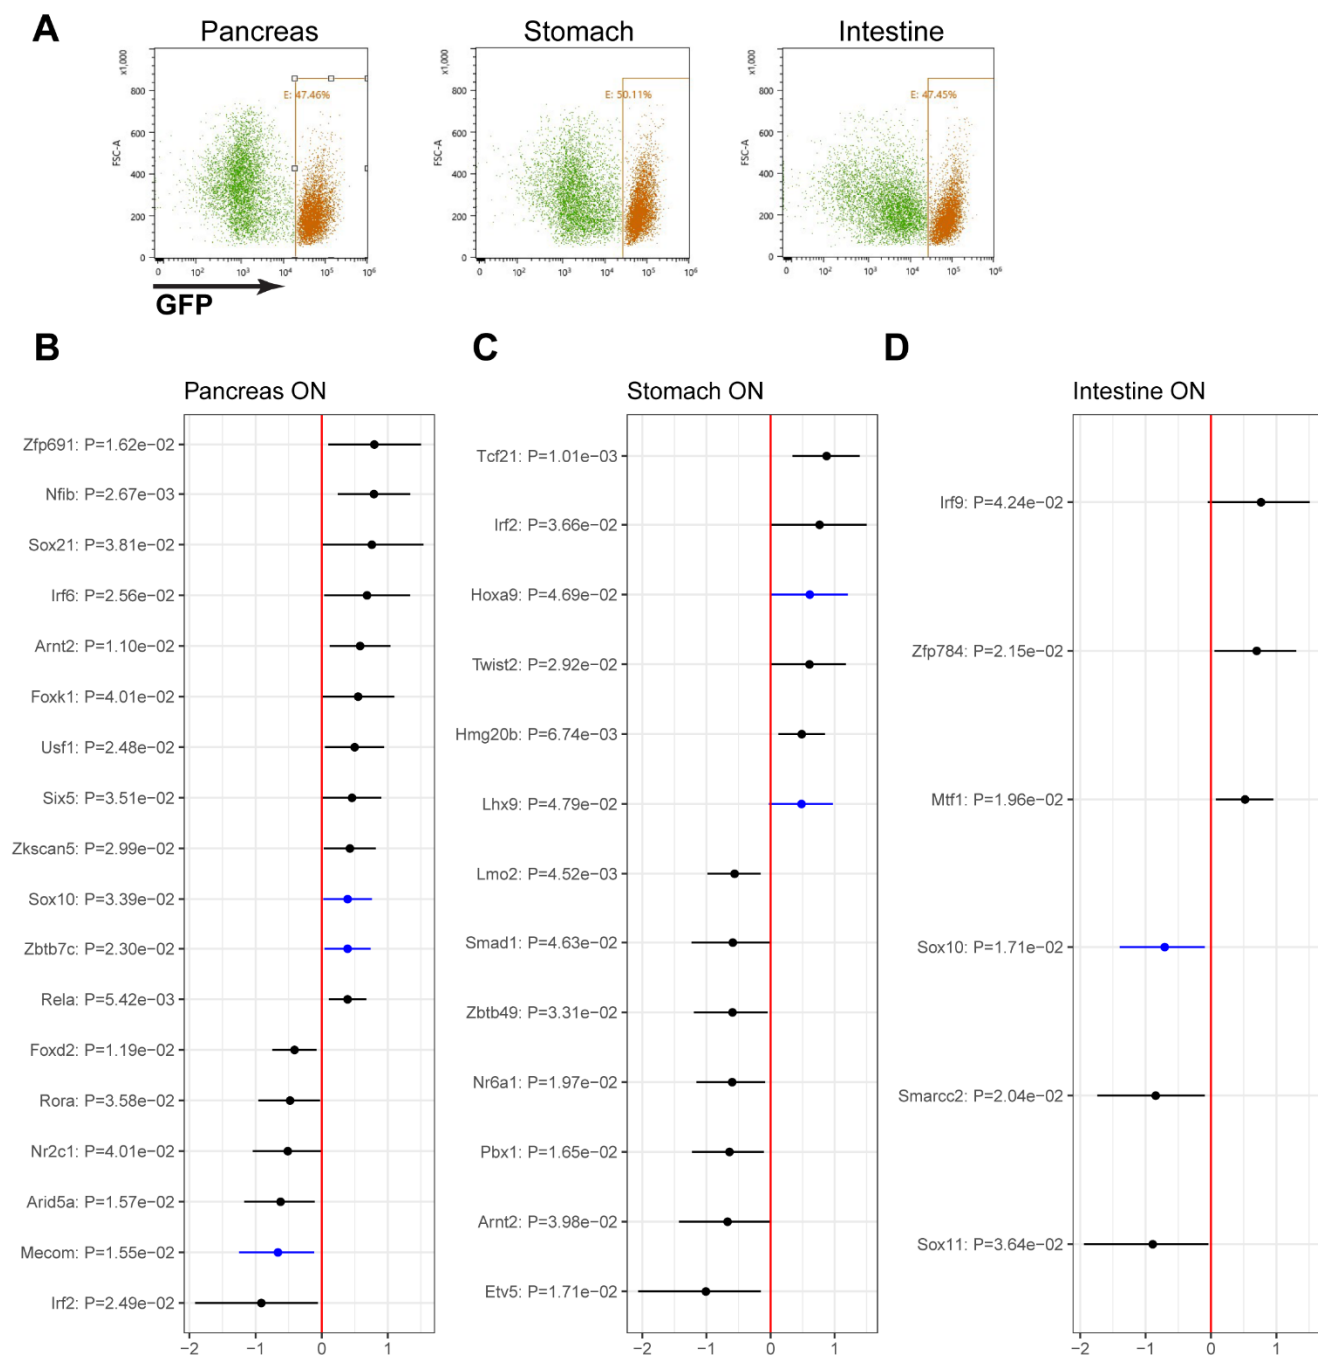

Supplementary Figure 1.

### Organ-specific mesenchymal transcription factors underlie E13.5 digestive organ development.

**A)** Representative flow cytometry plots of GFP<sup>+</sup> reporter expression in live cells of E13.5 *Bapx1*<sup>Cre/+</sup>; *ROSA26*<sup>mT/mG</sup> pancreas, stomach, and intestine. Horizontal axis indicates extent of GFP fluorescence. **B-D)** Transcription factors enriched in the pancreatic (B), stomach (C), and intestinal (D) mesenchyme. Horizontal line shows 90% confidence intervals; only TFs with  $p < 0.05$  are shown (Fisher's exact test), TFs plotted in blue are differentially expressed between control pancreatic mesenchyme and at least one of the stomach or intestinal mesenchyme types.

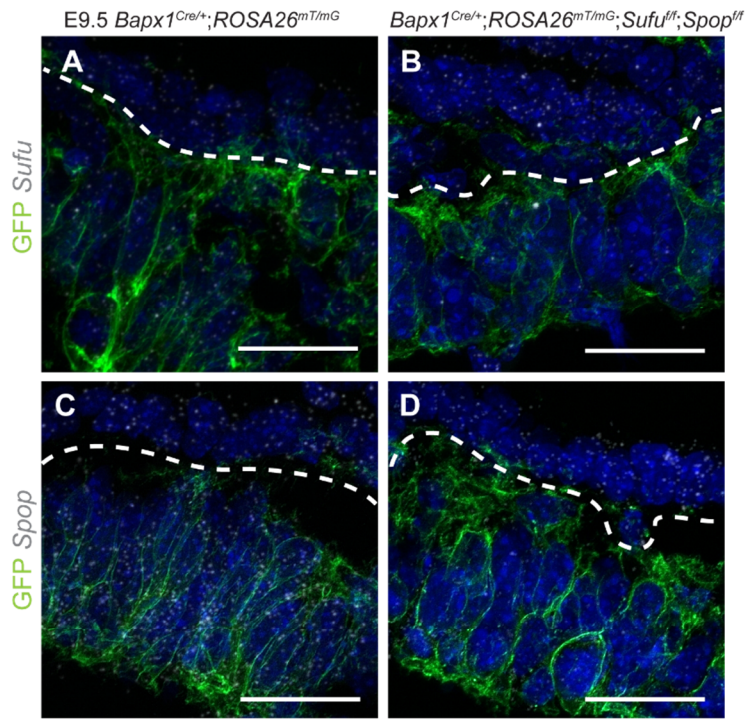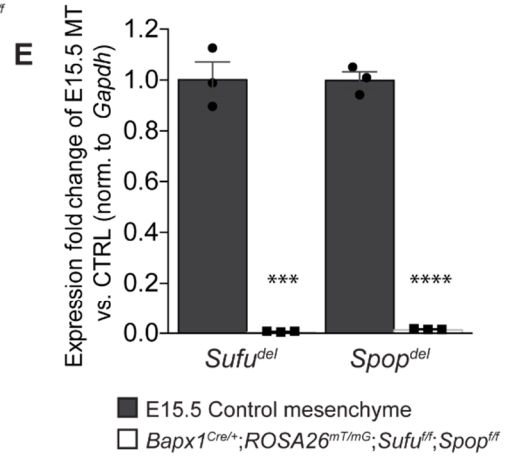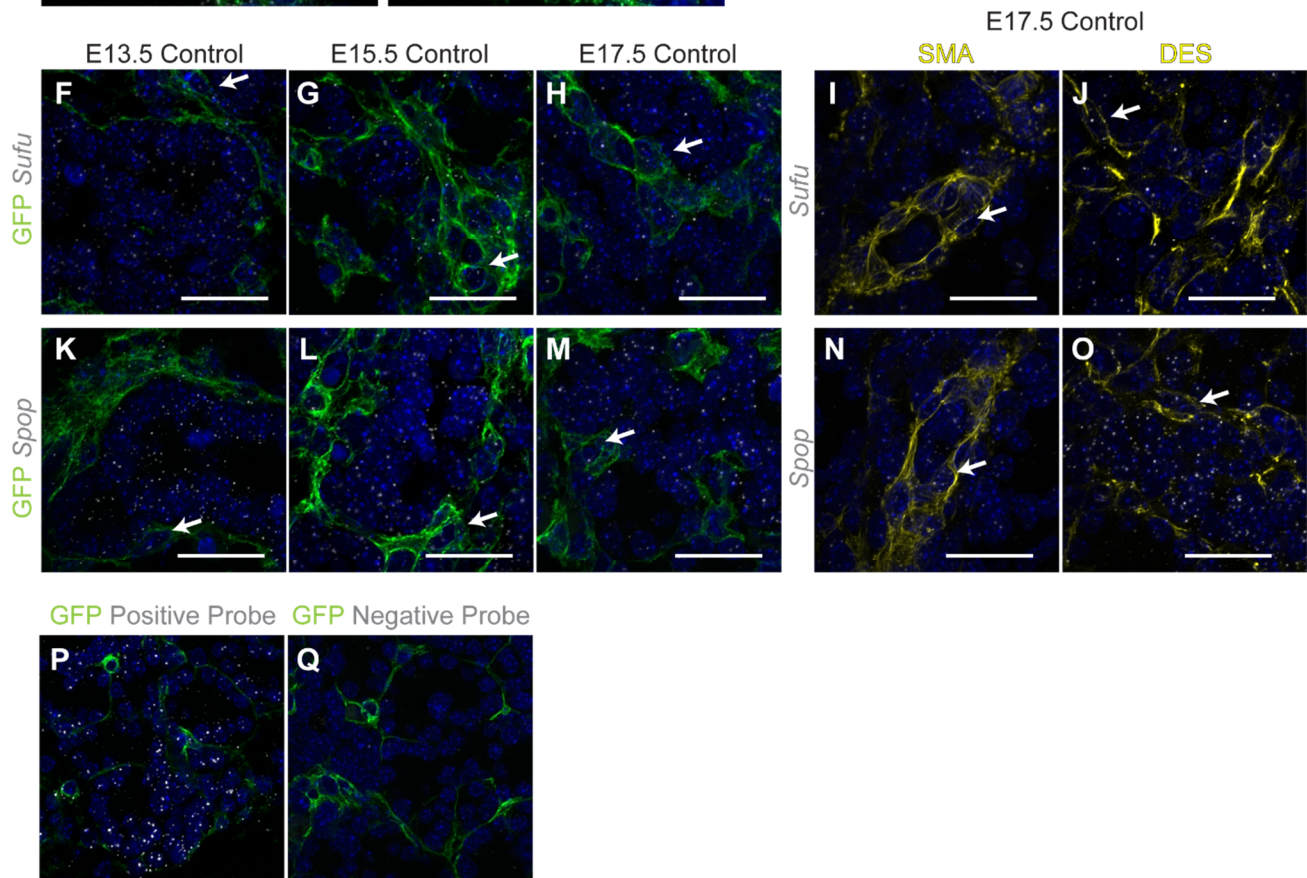

**Supplementary Figure 2.*****Sufu* and *Spop* exhibit widespread expression throughout embryonic pancreatic development.**

**A-B)** Single molecule fluorescent *in situ* hybridization (smFISH) for *Sufu* in *Bapx1<sup>Cre/+</sup>;ROSA26<sup>mT/mG</sup>* control (A) versus *Bapx1<sup>Cre/+</sup>;ROSA26<sup>mT/mG</sup>;Sufu<sup>ff</sup>;Spop<sup>ff</sup>* mutant (B) E9.5 gut tubes co-stained with GFP to mark *Bapx1*-expressing mesenchymal cells. **C-D)** smFISH for *Spop* in *Bapx1<sup>Cre/+</sup>;ROSA26<sup>mT/mG</sup>* control (C) versus *Bapx1<sup>Cre/+</sup>;ROSA26<sup>mT/mG</sup>;Sufu<sup>ff</sup>;Spop<sup>ff</sup>* mutant (D) E9.5 gut tubes co-stained with GFP. **E)** qPCR for the deletion sites of our *Sufu* and *Spop* alleles in sorted E15.5 GFP<sup>+</sup> mesenchymal cells of *Bapx1<sup>Cre/+</sup>;ROSA26<sup>mT/mG</sup>;Sufu<sup>ff</sup>;Spop<sup>ff</sup>* vs. *Bapx1<sup>Cre/+</sup>;ROSA26<sup>mT/mG</sup>* pancreata (n=3 samples per genotype). **F-H,K-M)** smFISH expression of *Sufu* (F-H) and *Spop* (K-M) in *Bapx1<sup>Cre/+</sup>;ROSA26<sup>mT/mG</sup>* pancreata during endocrine specification (E13.5), beta cell differentiation (E15.5), and final organization (E17.5). Co-staining with GFP marks mesenchymal reporter cells. **I-J,N-O)** smFISH expression of *Sufu* (I-J) and *Spop* (N-O) in SMA<sup>+</sup> and DES<sup>+</sup> interstitial subpopulations. **P)** Positive control probe on E17.5 pancreas tissue co-stained with mesenchymal GFP. **Q)** Negative control probe on E17.5 pancreas tissue co-stained with mesenchymal GFP. Arrows denote representative *Sufu* or *Spop* expressing cells. Dashed lines delineate mesenchyme versus epithelium. Data are means  $\pm$  SEM. n.s. denotes not significant, \*\*\* denotes  $p < 0.005$ , \*\*\*\* denotes  $p < 0.0005$  by Student's un-paired t-test. Scale bars- 50  $\mu$ m.

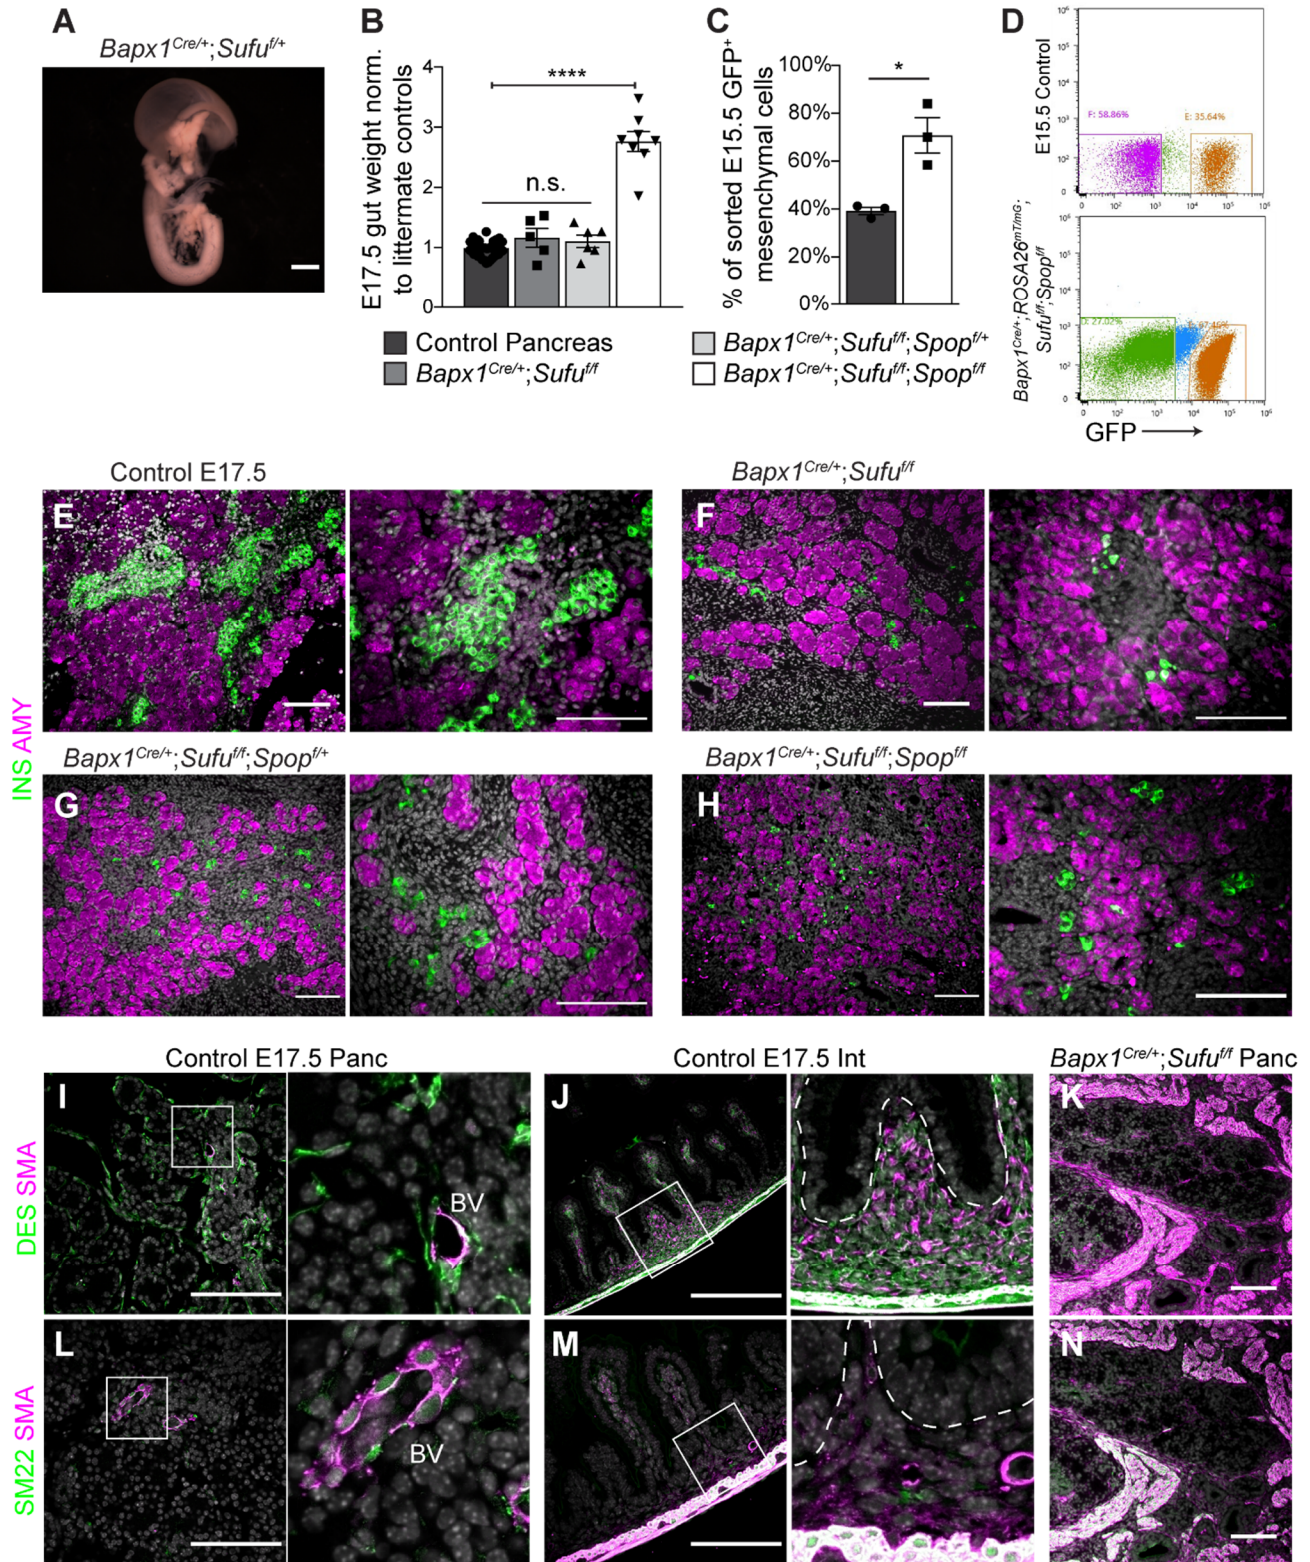

**Supplementary Figure 3.****Mesenchymal loss of *Sufu* and *Spop* impairs both pancreatic epithelium and mesenchyme.**

**A)** Representative image of E17.5 *Bapx1*<sup>Cre/+</sup>;*Sufu*<sup>ff</sup> gut. **B)** Ratio of *Sufu* and *Spop* mutant gut weight normalized to their littermate controls (n=50 controls, 5 *Bapx1*<sup>Cre/+</sup>;*Sufu*<sup>ff</sup>, 6 *Bapx1*<sup>Cre/+</sup>;*Sufu*<sup>ff</sup>;*Spop*<sup>ff/+</sup>, and 8 *Bapx1*<sup>Cre/+</sup>;*Sufu*<sup>ff</sup>;*Spop*<sup>ff/ff</sup> samples). **C)** Percentage of GFP<sup>+</sup> mesenchymal cells out of total live cells in E15.5 *Bapx1*<sup>Cre/+</sup>;*ROSA26*<sup>mT/mG</sup> controls and *Bapx1*<sup>Cre/+</sup>;*ROSA26*<sup>mT/mG</sup>;*Sufu*<sup>ff</sup>;*Spop*<sup>ff/ff</sup> mutants (n=3 samples per genotype). **D)** Representative flow cytometry plots of GFP<sup>+</sup> and GFP<sup>-</sup> live cells in control (upper panel) and mutant (lower panel) mesenchymes used to calculate panel C. **E-H)** Immunostaining for INS and AMY in E17.5 control (E), *Bapx1*<sup>Cre/+</sup>;*Sufu*<sup>ff</sup> (F), *Bapx1*<sup>Cre/+</sup>;*Sufu*<sup>ff</sup>;*Spop*<sup>ff/+</sup> (G), and *Bapx1*<sup>Cre/+</sup>;*Sufu*<sup>ff</sup>;*Spop*<sup>ff/ff</sup> (H) pancreata. Left panels: Lower magnification overview. Right panels: Higher magnification images for clarity. **I,L)** In the pancreatic mesenchyme, SMA (I) and SM22 (L) are found expressed in blood vessels (BV) with the mesenchyme being predominantly single positive for DES (I). **J,M)** Immunostaining for SMA (J) and SM22 (M) throughout the intestinal mesenchyme at E17.5. **K,N)** In *Bapx1*<sup>Cre/+</sup>;*Sufu*<sup>ff</sup> embryos, pancreatic tissue is embedded into a matrix of SMA<sup>+</sup> (K) and SM22<sup>+</sup> (N) cells. White boxes correspond to higher magnification panels. Data are means ± SEM. n.s. denotes not significant, \* denotes p<0.05 by Student's un-paired t-test. Scale bars: Whole mount- 1 mm, Immunofluorescence- 100 μm.

**Supplementary Figure 4**

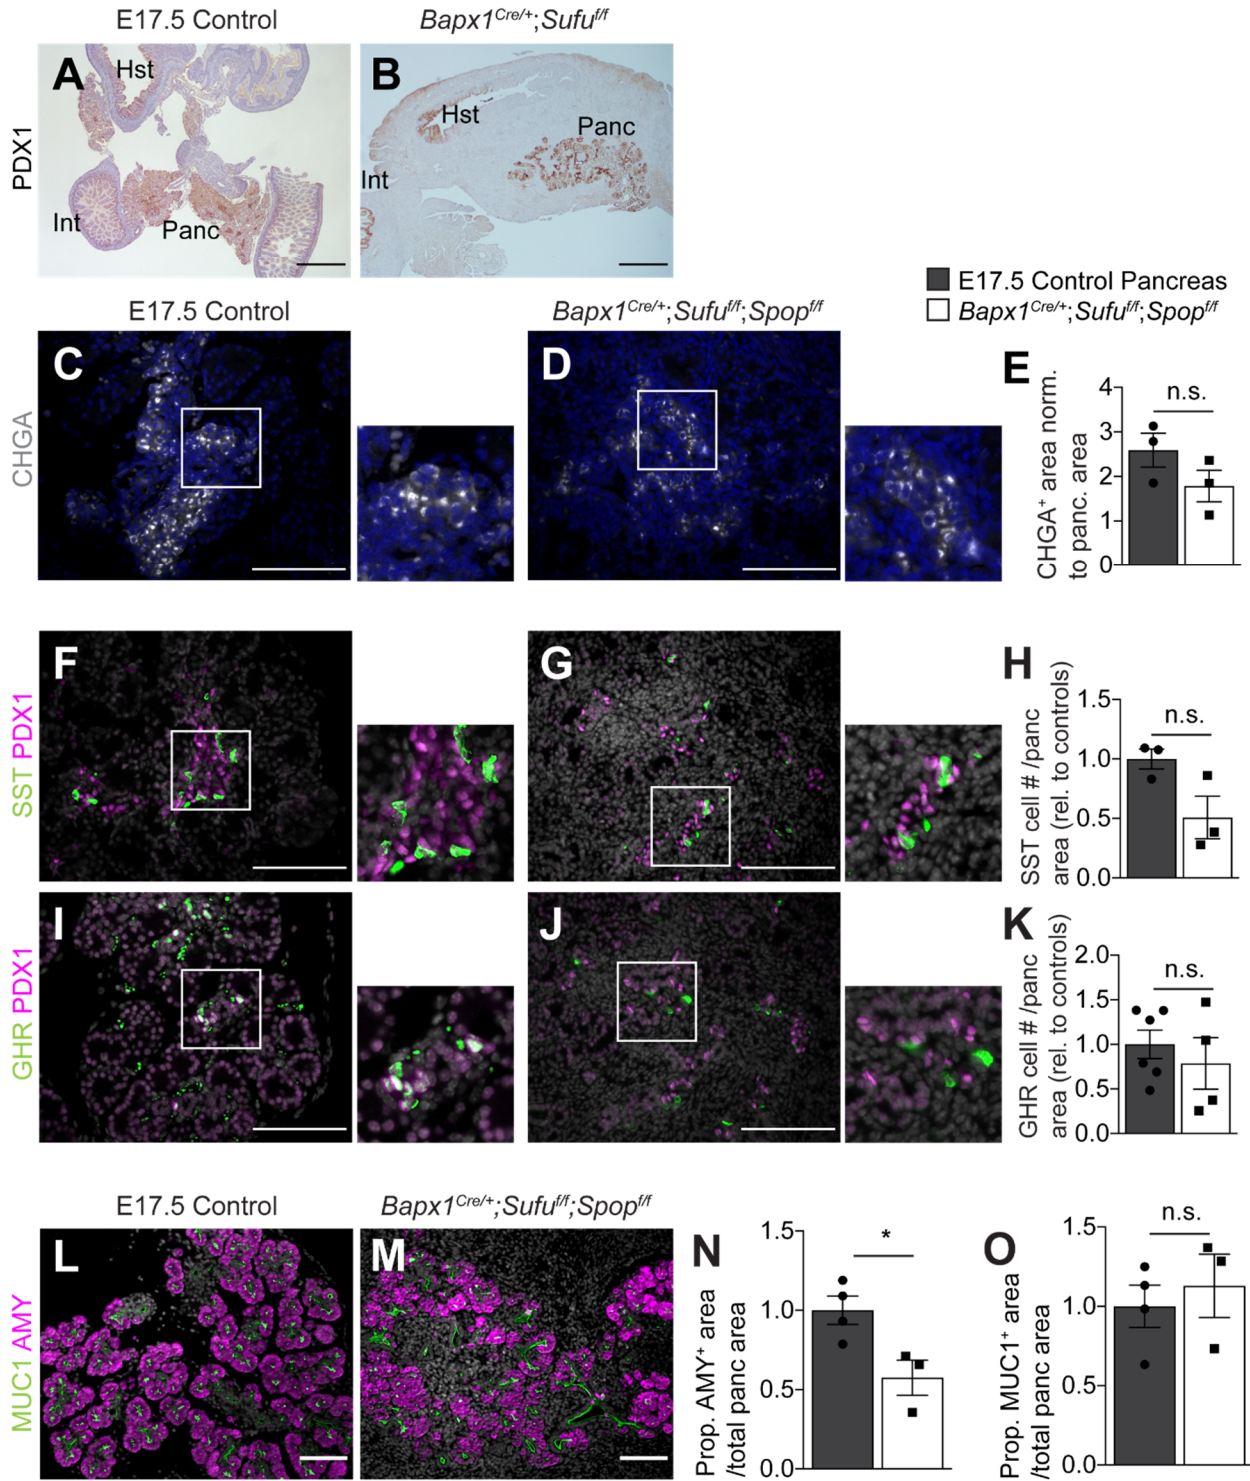

**Supplementary Figure 4.****Characterization of endocrine and exocrine cell populations in *Sufu Spop* mesenchymal mutants.**

**A-B)** Immunohistochemical staining for PDX1 in the pancreas (Panc), hindstomach (Hst), and proximal intestine (Int) of E17.5 control (A) and *Bapx1<sup>Cre/+</sup>;Sufu<sup>ff</sup>* mutants (B). No ectopic formation of PDX1<sup>+</sup> cells is observed outside of these domains. **C-D)** Immunostaining for Chromogranin A (CHGA) in E17.5 controls (C) versus *Bapx1<sup>Cre/+</sup>;Sufu<sup>ff</sup>;Spop<sup>ff</sup>* mutants (D). **E)** Assessment of CHGA<sup>+</sup> endocrine cell area as a proportion of pancreatic tissue area (n=3 samples per genotype). **F-G)** Immunostaining for Somatostatin (SST) and PDX1 in E17.5 controls (F) versus *Bapx1<sup>Cre/+</sup>;Sufu<sup>ff</sup>;Spop<sup>ff</sup>* mutants (G). **H)** Quantification of SST<sup>+</sup> cell numbers as normalized to pancreatic tissue area in controls versus mutants (n=3 samples each genotype). **I-J)** Immunostaining for Ghrelin (GHR) and PDX1 in E17.5 controls (I) versus *Bapx1<sup>Cre/+</sup>;Sufu<sup>ff</sup>;Spop<sup>ff</sup>* mutants (J). **K)** Quantification of GHR<sup>+</sup> cell numbers as normalized to pancreatic tissue area in controls versus mutants (n=6 control, 4 mutant samples). **L-M)** Representative images for exocrine markers, AMY (acini) and MUC1 (ducts) in E17.5 control (L) versus *Bapx1<sup>Cre/+</sup>;Sufu<sup>ff</sup>;Spop<sup>ff</sup>* mutants (M). **N)** Quantification of the proportion of AMY<sup>+</sup> area to total pancreatic tissue area in mutants, normalized to proportions found in controls (n=3 samples per genotype). **O)** Quantification of the proportion of MUC1<sup>+</sup> area to total pancreatic tissue area in mutants, normalized to proportions found in controls (n=3 samples per genotype). White boxes correspond to higher magnification panels. Data are means  $\pm$  SEM. n.s. denotes not significant, \* denotes p<0.05 by Student's un-paired t-test. Scale bars: Histology- 500  $\mu$ m, Immunofluorescence- 100  $\mu$ m.



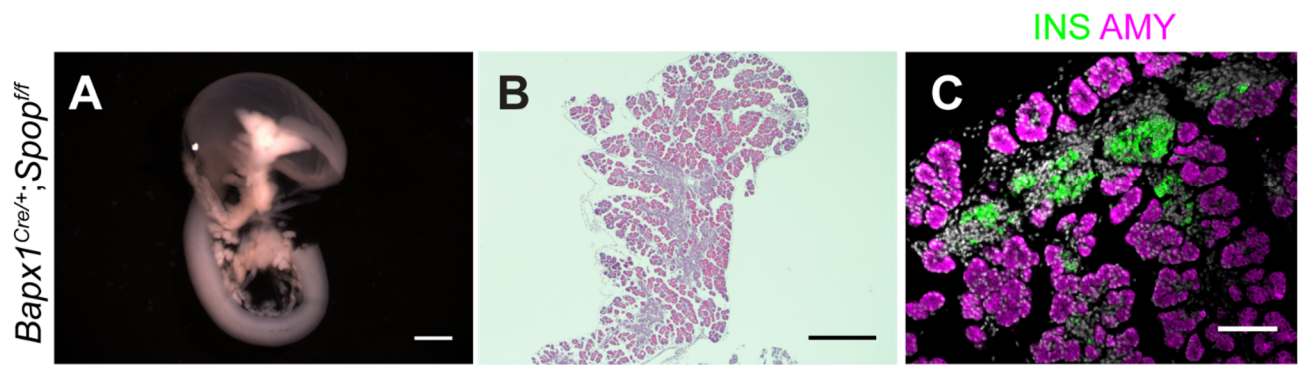

### Supplementary Figure 5.

**Mesenchymal loss of *Spop* does not impair pancreatic development.** **A)** Mesenchymal loss of *Spop* (*Bapx1<sup>Cre/+</sup>; Spop<sup>ff</sup>*) does not overtly affect pancreatic morphology. **B)** Representative histological stain of *Bapx1<sup>Cre/+</sup>; Spop<sup>ff</sup>* pancreas. **C)** Immunostaining for INS and AMY in E17.5 *Bapx1<sup>Cre/+</sup>; Spop<sup>ff</sup>* pancreas. Scale bars: Whole mount- 1 mm, Histology- 500  $\mu$ m, Immunofluorescence- 100  $\mu$ m.

SM22 SMA

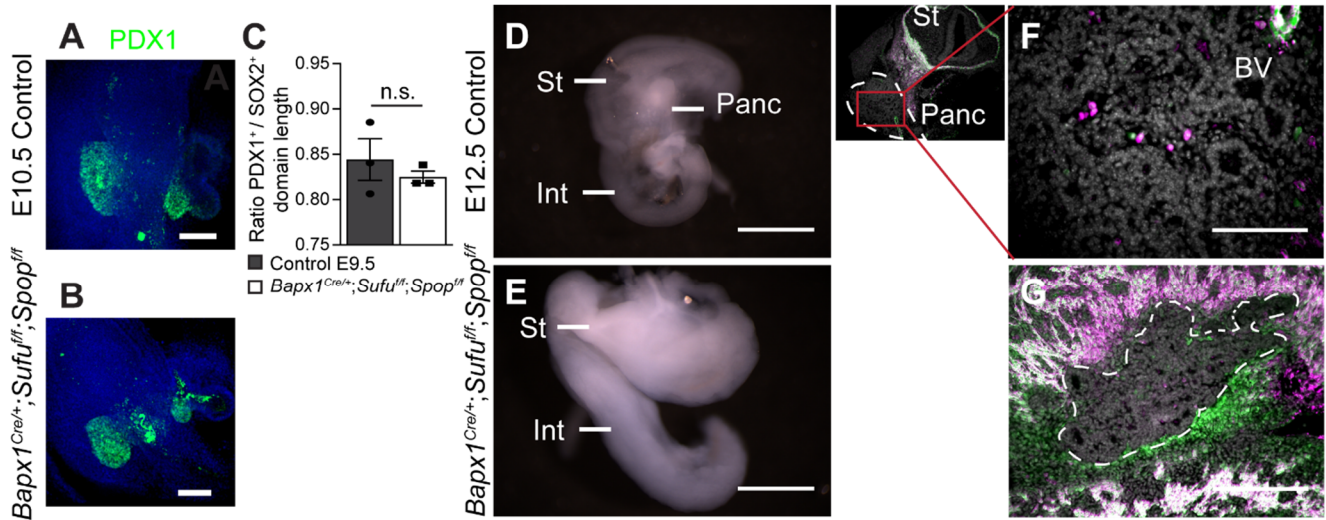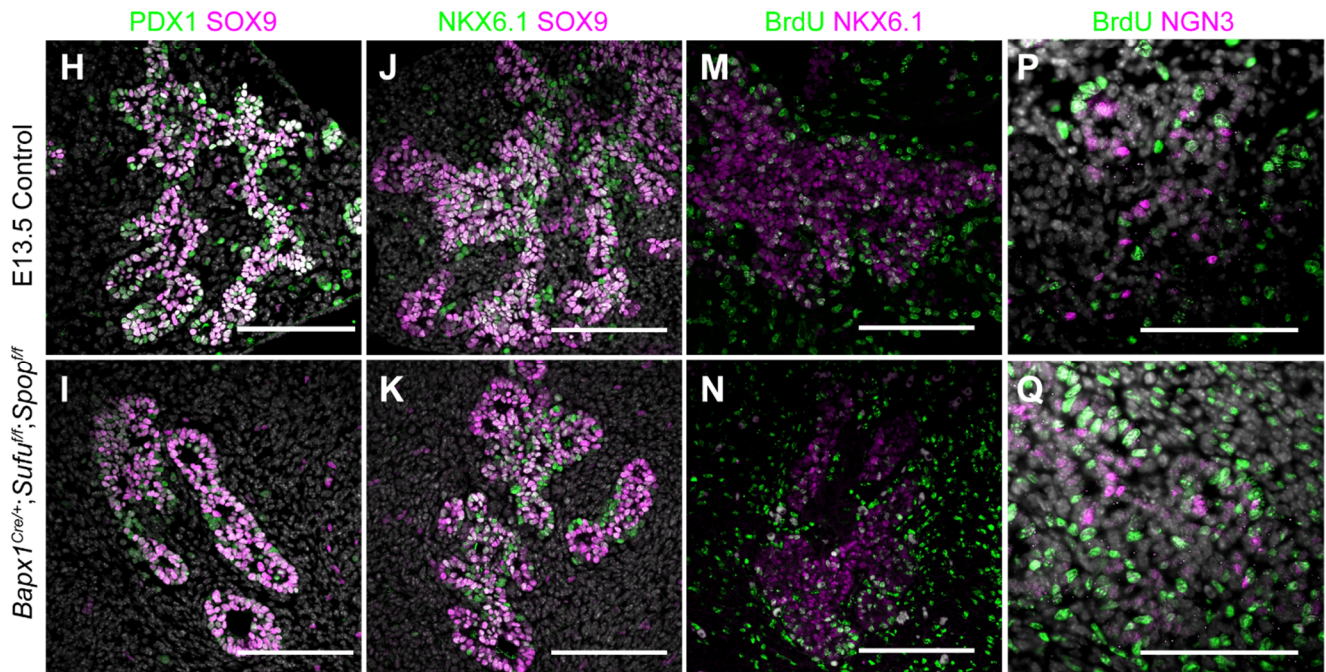

■ Control E13.5  
□ *Bapx1<sup>Cre/+</sup>; Sufu<sup>fl/fl</sup>; Spop<sup>fl/fl</sup>*

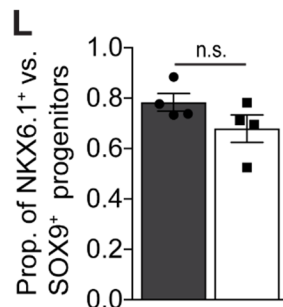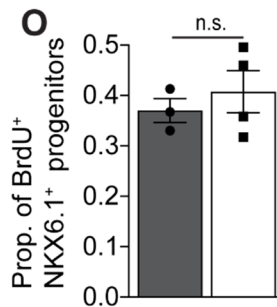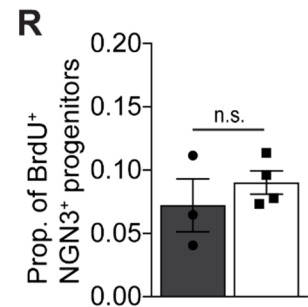

**Supplementary Figure 6.****Characterization of *Sufu Spop* mesenchymal mutants during compartmental specification.**

**A-B)** Whole mount immunostaining for the PDX1<sup>+</sup> pancreatic progenitor pool, observed as buds evaginating from the embryonic gut tube, in E10.5 controls (A) and *Bapx1<sup>Cre/+</sup>;Sufu<sup>ff</sup>;Spop<sup>ff</sup>* mutants (B). **C)** Quantification of the ratio of PDX1<sup>+</sup> versus SOX2<sup>+</sup> domain length along the E9.5 gut tube in controls and *Bapx1<sup>Cre/+</sup>;Sufu<sup>ff</sup>;Spop<sup>ff</sup>* mutants (n=3 samples each genotype). **D)** E12.5 control embryos exhibit an external pancreas (Panc) located adjacent to the stomach (St) and proximal intestine (Int). **E)** At E12.5, *Bapx1<sup>Cre/+</sup>;Sufu<sup>ff</sup>;Spop<sup>ff</sup>* embryos already lose an externally visible pancreas and exhibit mesenchymal hyperplasia. **F)** Immunostaining for SMA and SM22 in E12.5 controls demonstrates expression in the stomach mesenchyme and absence from the pancreatic mesenchyme (dashed outline). BV- blood vessel. **G)** In E12.5 *Bapx1<sup>Cre/+</sup>;Sufu<sup>ff</sup>;Spop<sup>ff</sup>* embryos, mutant pancreatic mesenchyme stains for SMA and SM22 (dashed outline denotes pancreas). **H-I)** SOX9<sup>+</sup> PDX1<sup>+</sup> co-localization in the pancreatic progenitors of E13.5 control (H) and *Bapx1<sup>Cre/+</sup>;Sufu<sup>ff</sup>;Spop<sup>ff</sup>* mutants (I). **J,K)** Compartmentalization of immuno-stained NKX6.1<sup>+</sup> trunk cells within the SOX9<sup>+</sup> progenitor population in E13.5 control (J) versus *Bapx1<sup>Cre/+</sup>;Sufu<sup>ff</sup>;Spop<sup>ff</sup>* mutants (K). **L)** Quantification of the proportion of NKX6.1<sup>+</sup> cell number as a proportion of total NKX6.1<sup>+</sup> and/or SOX9<sup>+</sup> total cell number (n=4 samples per genotype). **M,N)** Immunostaining of NKX6.1<sup>+</sup> trunk progenitor cells marked by thymidine analog, 5-bromo-2'-deoxyuridine (BrdU) one hour after administration, in E13.5 control (M) versus *Bapx1<sup>Cre/+</sup>;Sufu<sup>ff</sup>;Spop<sup>ff</sup>* mutants (N). **O)** Quantification of the proportion of NKX6.1<sup>+</sup> cells co-labelled with BrdU as a measure of trunk endocrine progenitor proliferation in mutants versus controls (n=3 control, 4 mutant samples). **P,Q)** Immunostaining of NGN3<sup>+</sup> committed endocrine progenitors marked by BrdU one hour after administration, in E13.5 control (P) versus *Bapx1<sup>Cre/+</sup>;Sufu<sup>ff</sup>;Spop<sup>ff</sup>* mutants (Q). **R)** Quantification of proliferation, as marked by BrdU, in NGN3<sup>+</sup> endocrine progenitors of E13.5 mutants and controls (n=3 control, 4 mutant samples). Data are means ± SEM. n.s. denotes not significant, \* denotes p<0.05 by Student's un-paired t-test. Scale bars: Whole mount- 1 mm, Whole mount immunofluorescence- 90 μm, Immunofluorescence- 100 μm.

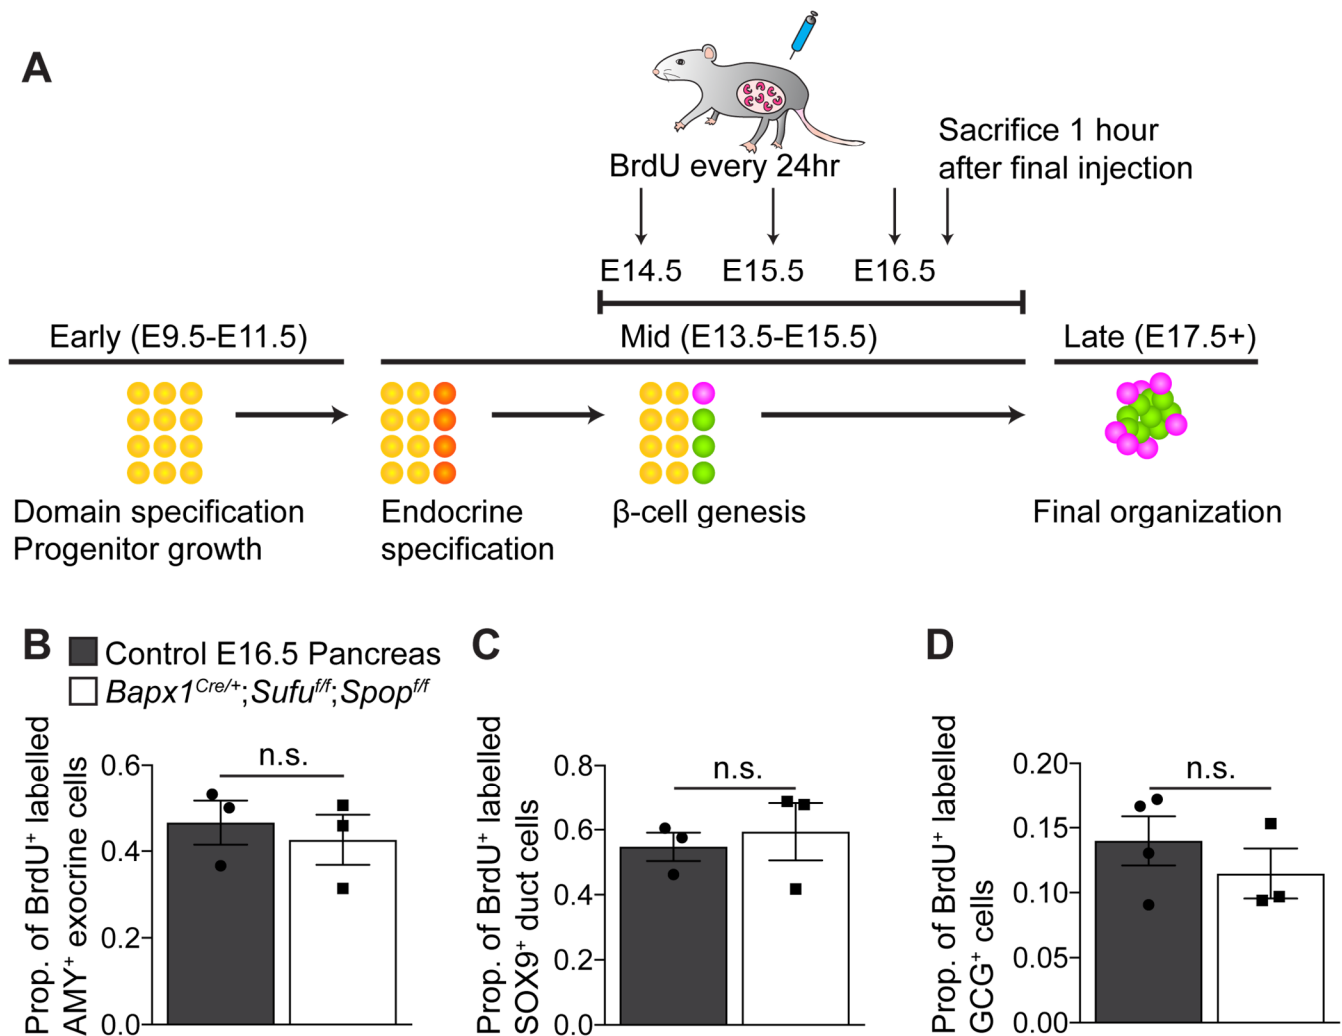

Supplementary Figure 7.

**Characterization of cell population growth in *Sufu Spop* mesenchymal mutants via BrdU tracing.**

**A)** Schematic for beta cell genesis tracing experiments with thymidine analog, 5-bromo-2'-deoxyuridine (BrdU). BrdU was administered every 24 hours from E14.5 to E16.5 via intraperitoneal injection of pregnant dams and harvested 1 hour after the final injection on E16.5. As intrinsic replication of beta cells during this time is rare<sup>1</sup> and beta cell differentiation occurs after E13.5, BrdU uptake from E14.5-E16.5 will predominantly mark newly synthesized endocrine progenitors that then differentiate into endocrine sub-types. Co-staining BrdU with INS will then mark endocrine progenitors that have differentiated into INS<sup>+</sup> beta cells. **B)** Quantification of the proportion of AMY<sup>+</sup> acinar cells in *Bapx1<sup>Cre/+</sup>;Sufu<sup>fl/fl</sup>;Spop<sup>fl/fl</sup>* mutants marked by BrdU after E14.5-E16.5 tracing as compared to controls (n=3 samples per genotype). **C)** Quantification of the proportion of SOX9<sup>+</sup> duct cells marked by BrdU after E14.5-E16.5 tracing in *Bapx1<sup>Cre/+</sup>;Sufu<sup>fl/fl</sup>;Spop<sup>fl/fl</sup>* mutants compared to controls (n=3 samples per genotype). **D)** Quantification of the proportion of GCG<sup>+</sup> glucagon cells marked by BrdU after E14.5-E16.5 tracing in *Bapx1<sup>Cre/+</sup>;Sufu<sup>fl/fl</sup>;Spop<sup>fl/fl</sup>* mutants compared to controls (n=3 samples per genotype). Data are means  $\pm$  SEM. n.s. denotes not significant, \* denotes p<0.05 by Student's unpaired t-test.

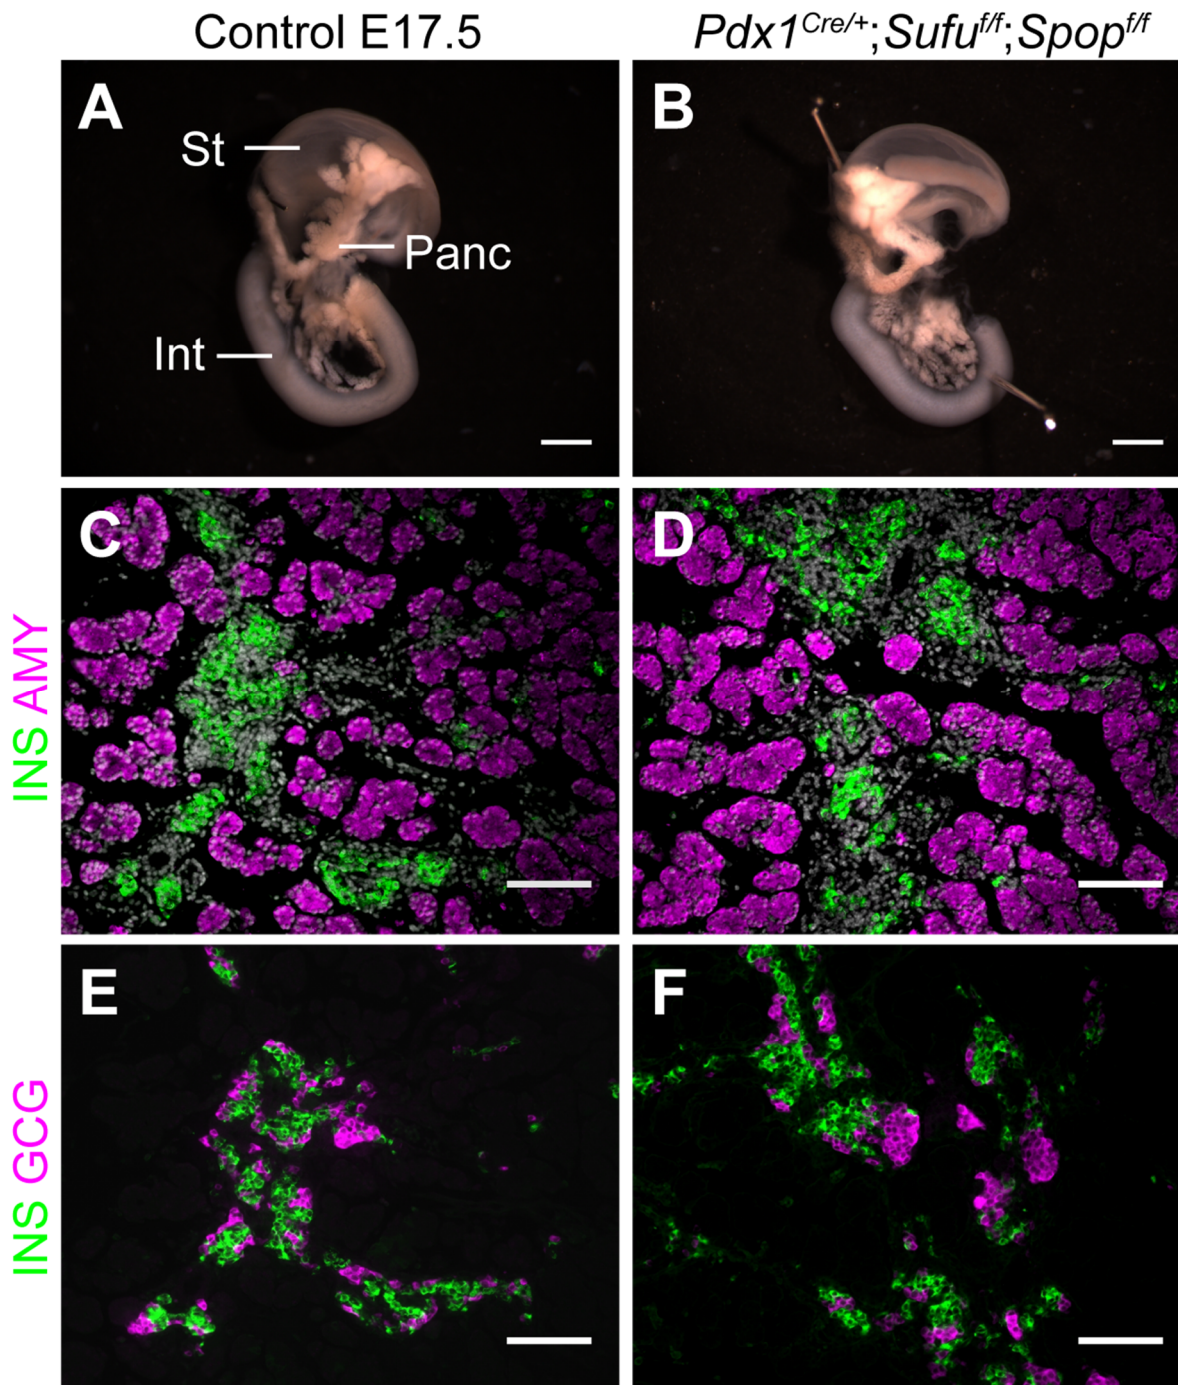

**Supplementary Figure 8.**

**Loss of pancreatic epithelial *Sufu* and *Spop* does not cause discernable developmental defects.**

**A-B)** *Pdx1<sup>Cre/+</sup>;Sufu<sup>ff</sup>;Spop<sup>ff</sup>* embryos (B) phenotypically appear normal as compared to E17.5 controls (A). St- stomach, Panc- pancreas, Int- Intestine. **C-D)** Immunostaining for INS and AMY indicates proper differentiation of exocrine and endocrine compartments in E17.5 controls (C) and *Pdx1<sup>Cre/+</sup>;Sufu<sup>ff</sup>;Spop<sup>ff</sup>* mutants (D). **E-F)** Endocrine makeup of INS<sup>+</sup> versus GCG<sup>+</sup> cells in *Pdx1<sup>Cre/+</sup>;Sufu<sup>ff</sup>;Spop<sup>ff</sup>* embryos (F) remains comparable to controls (E). Scale bars: Whole mount- 1 mm, Immunofluorescence- 100  $\mu$ m.

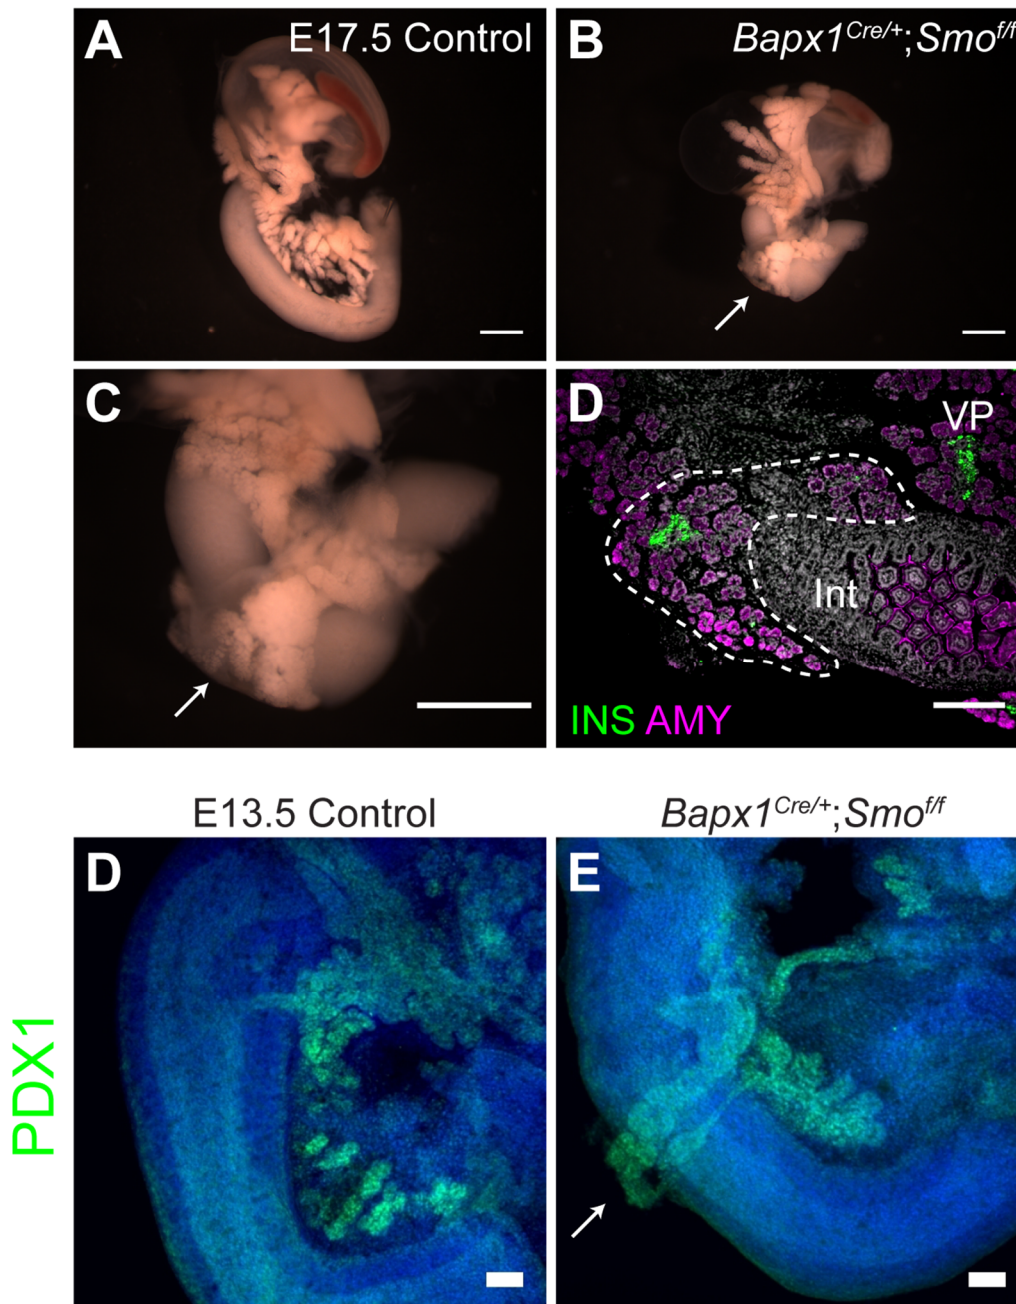

**Supplementary Figure 9.**

**Mesenchymal Hedgehog inhibition leads to ectopic epithelial branching in the pancreas.** **A)** E17.5 control pancreata, exhibit a ventral domain (VP) nestled into the proximal intestinal loop (Int). **B)** Inhibition of mesenchymal Hedgehog signaling in *Bapx1<sup>Cre/+</sup>;Smo<sup>fl/fl</sup>* embryos leads to ectopic branching (arrow) from the ventral pancreatic domain to form an annulus around the intestine. **C)** Higher magnification image of pancreatic annulus in *Bapx1<sup>Cre/+</sup>;Smo<sup>fl/fl</sup>* embryos (arrow). **D)** This annulus (dashed outline) stains for INS and AMY, indicative of pancreatic identity. **E-F)** Whole mount immunofluorescence for PDX1 in E13.5 controls (E) versus *Bapx1<sup>Cre/+</sup>;Smo<sup>fl/fl</sup>* mutants (F) reveals ectopic PDX1<sup>+</sup> pancreatic branching (arrow) during branching morphogenesis. VP- Ventral pancreas. Int- Intestine. Scale bars: Whole mount- 1 mm, Immunofluorescence- 100 μm.

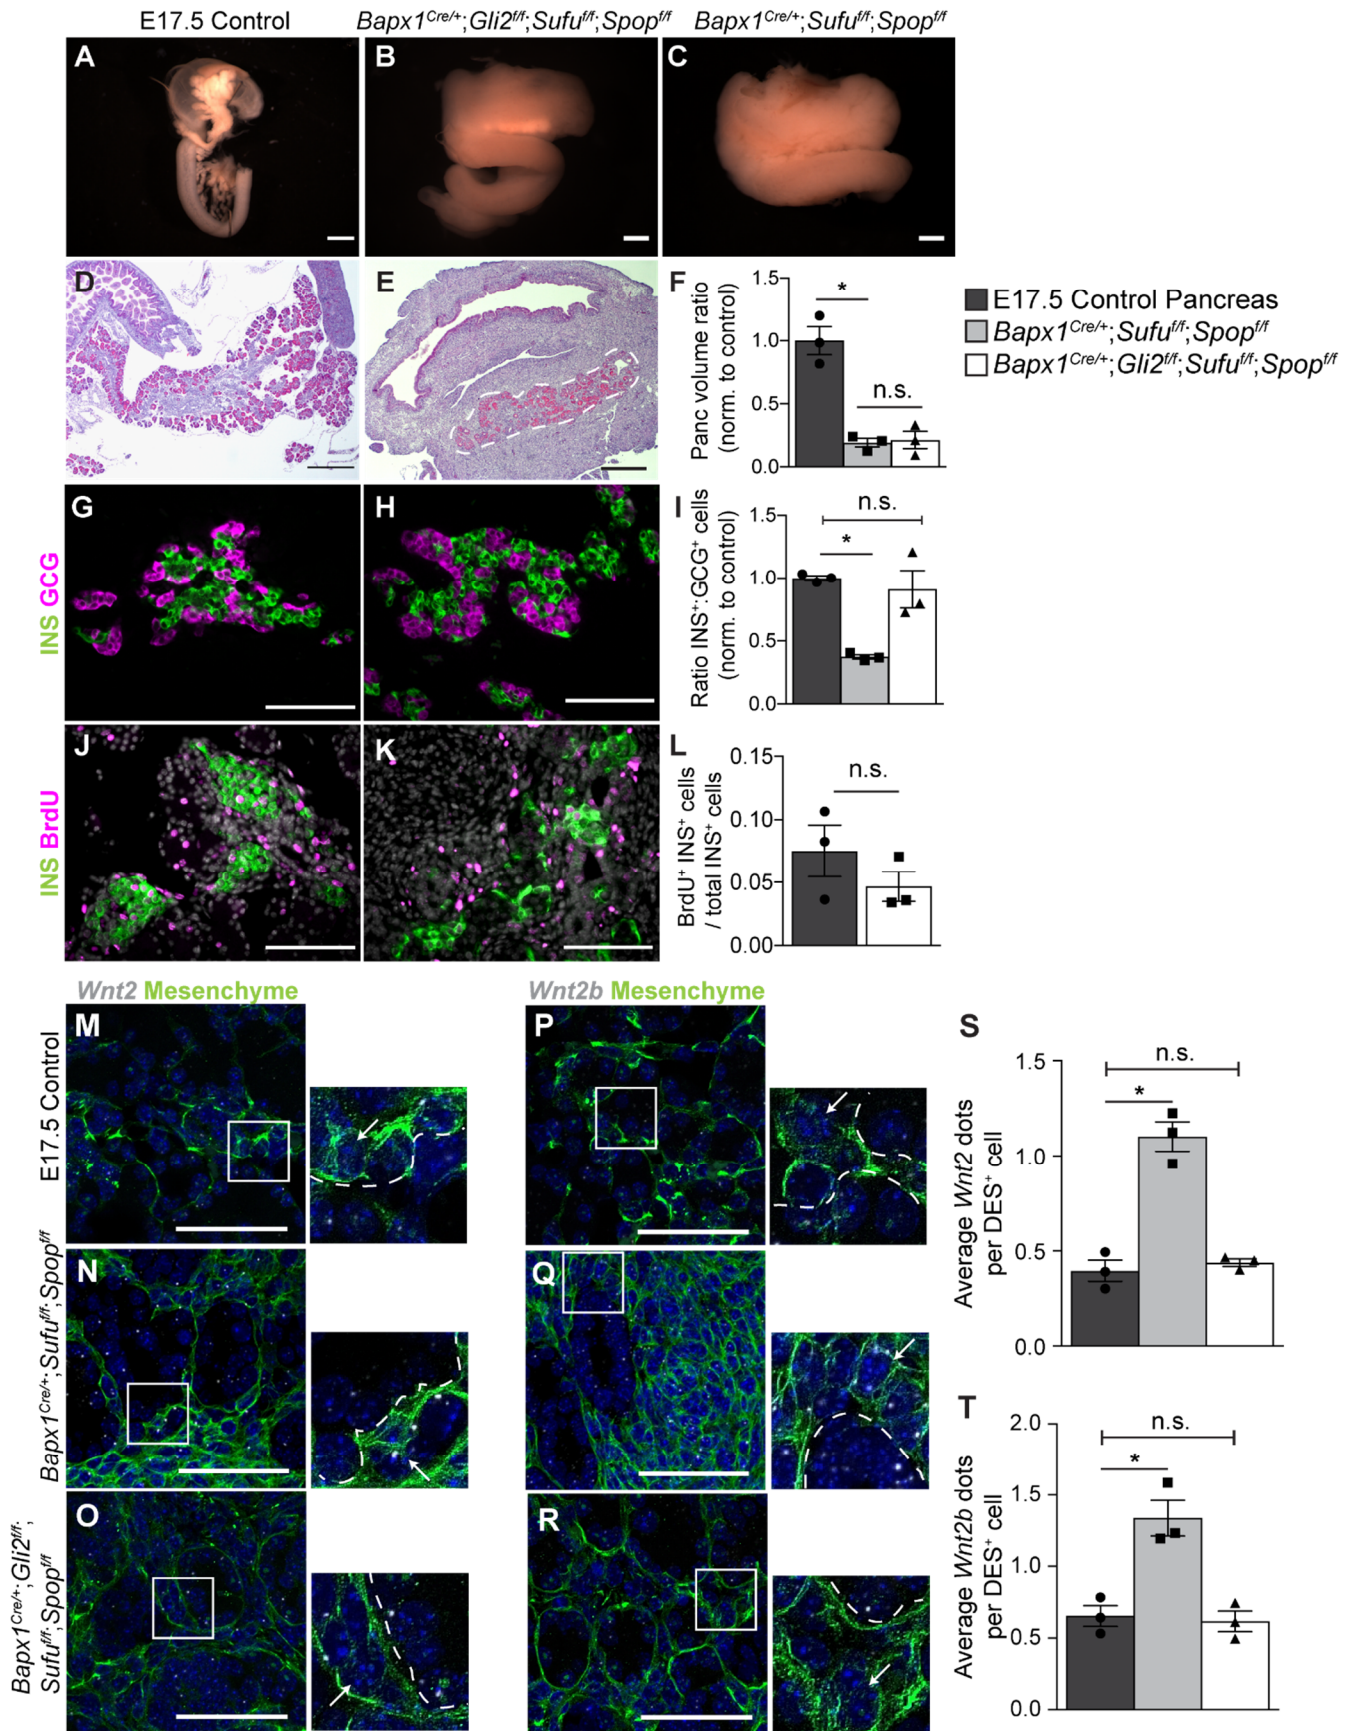

**Supplementary Figure 10.****Mesenchymal deletion of *Gli2* partially rescues *Sufu Spop* mesenchymal mutant defects.**

**A-C** E17.5 gut of embryos harboring *Gli2* deletion in mesenchymal *Sufu* and *Spop* mutant background (*Bapx1<sup>Cre/+</sup>;Gli2<sup>ff</sup>;Sufu<sup>ff</sup>;Spop<sup>ff</sup>*) (B) as compared to E17.5 control (A) and the original *Bapx1<sup>Cre/+</sup>;Sufu<sup>ff</sup>;Spop<sup>ff</sup>* mutant (C). **D** Histological staining of E17.5 control demonstrating predominantly cytoplasmic makeup of pancreatic tissue (pink eosin). **E** Histological staining of E17.5 *Bapx1<sup>Cre/+</sup>;Gli2<sup>ff</sup>;Sufu<sup>ff</sup>;Spop<sup>ff</sup>* guts revealing integration of cytoplasmic pancreatic tissue (dashed outline denotes pancreas). **F** Comparison of the ratios in E17.5 pancreatic volume between *Bapx1<sup>Cre/+</sup>;Sufu<sup>ff</sup>;Spop<sup>ff</sup>* mutants and their controls versus *Bapx1<sup>Cre/+</sup>;Gli2<sup>ff</sup>;Sufu<sup>ff</sup>;Spop<sup>ff</sup>* rescues and their controls (n=3 samples of each genotype). **G-H** Immunostaining for INS and GCG in E17.5 control (G) and *Bapx1<sup>Cre/+</sup>;Gli2<sup>ff</sup>;Sufu<sup>ff</sup>;Spop<sup>ff</sup>* embryos (H). **I** Comparison of INS<sup>+</sup>:GCG<sup>+</sup> cell ratios between *Bapx1<sup>Cre/+</sup>;Sufu<sup>ff</sup>;Spop<sup>ff</sup>* mutants and their controls versus *Bapx1<sup>Cre/+</sup>;Gli2<sup>ff</sup>;Sufu<sup>ff</sup>;Spop<sup>ff</sup>* rescues and their controls (n=3 samples of each genotype). **J-K** Immunostaining for INS and proliferation marker, 5-bromo-2'-deoxyuridine (BrdU) in E17.5 control (J) and *Bapx1<sup>Cre/+</sup>;Gli2<sup>ff</sup>;Sufu<sup>ff</sup>;Spop<sup>ff</sup>* embryos (K). **L** Assessment of INS<sup>+</sup> beta cell proliferation in E17.5 *Bapx1<sup>Cre/+</sup>;Gli2<sup>ff</sup>;Sufu<sup>ff</sup>;Spop<sup>ff</sup>* versus control embryos injected with BrdU one hour prior to sacrifice (n=3 samples per genotype). **M-O** Representative single molecule fluorescent *in situ* hybridization (smFISH) images for Wnt ligand, *Wnt2*, in E17.5 control (M), *Bapx1<sup>Cre/+</sup>;Sufu<sup>ff</sup>;Spop<sup>ff</sup>* (N), and *Bapx1<sup>Cre/+</sup>;Gli2<sup>ff</sup>;Sufu<sup>ff</sup>;Spop<sup>ff</sup>* (O) pancreata co-stained with DES to mark mesenchymal cells. **P-R** Representative smFISH images for Wnt ligand, *Wnt2b*, in E17.5 control (P), *Bapx1<sup>Cre/+</sup>;Sufu<sup>ff</sup>;Spop<sup>ff</sup>* (Q), and *Bapx1<sup>Cre/+</sup>;Gli2<sup>ff</sup>;Sufu<sup>ff</sup>;Spop<sup>ff</sup>* (R) pancreata co-stained with DES. **S-T** Quantification of smFISH dots per DES<sup>+</sup> mesenchymal cell for Wnt ligands, *Wnt2* (S) and *Wnt2b* (T) of E17.5 *Bapx1<sup>Cre/+</sup>;Gli2<sup>ff</sup>;Sufu<sup>ff</sup>;Spop<sup>ff</sup>* embryos versus controls and *Bapx1<sup>Cre/+</sup>;Sufu<sup>ff</sup>;Spop<sup>ff</sup>* mutants (n=3 samples per genotype). White boxes correspond to zoomed-in panels. Dashed line separates DES<sup>-</sup> epithelium and DES<sup>+</sup> mesenchyme. Arrows indicate representative mesenchymal cells. Data are means ± SEM. n.s. denotes not significant, \* denotes p<0.05 by Student's un-paired t-test. Scale bars: Whole mount- 1 mm, Histology- 500 μm, Immunofluorescence- 100 μm, smFISH- 50 μm.



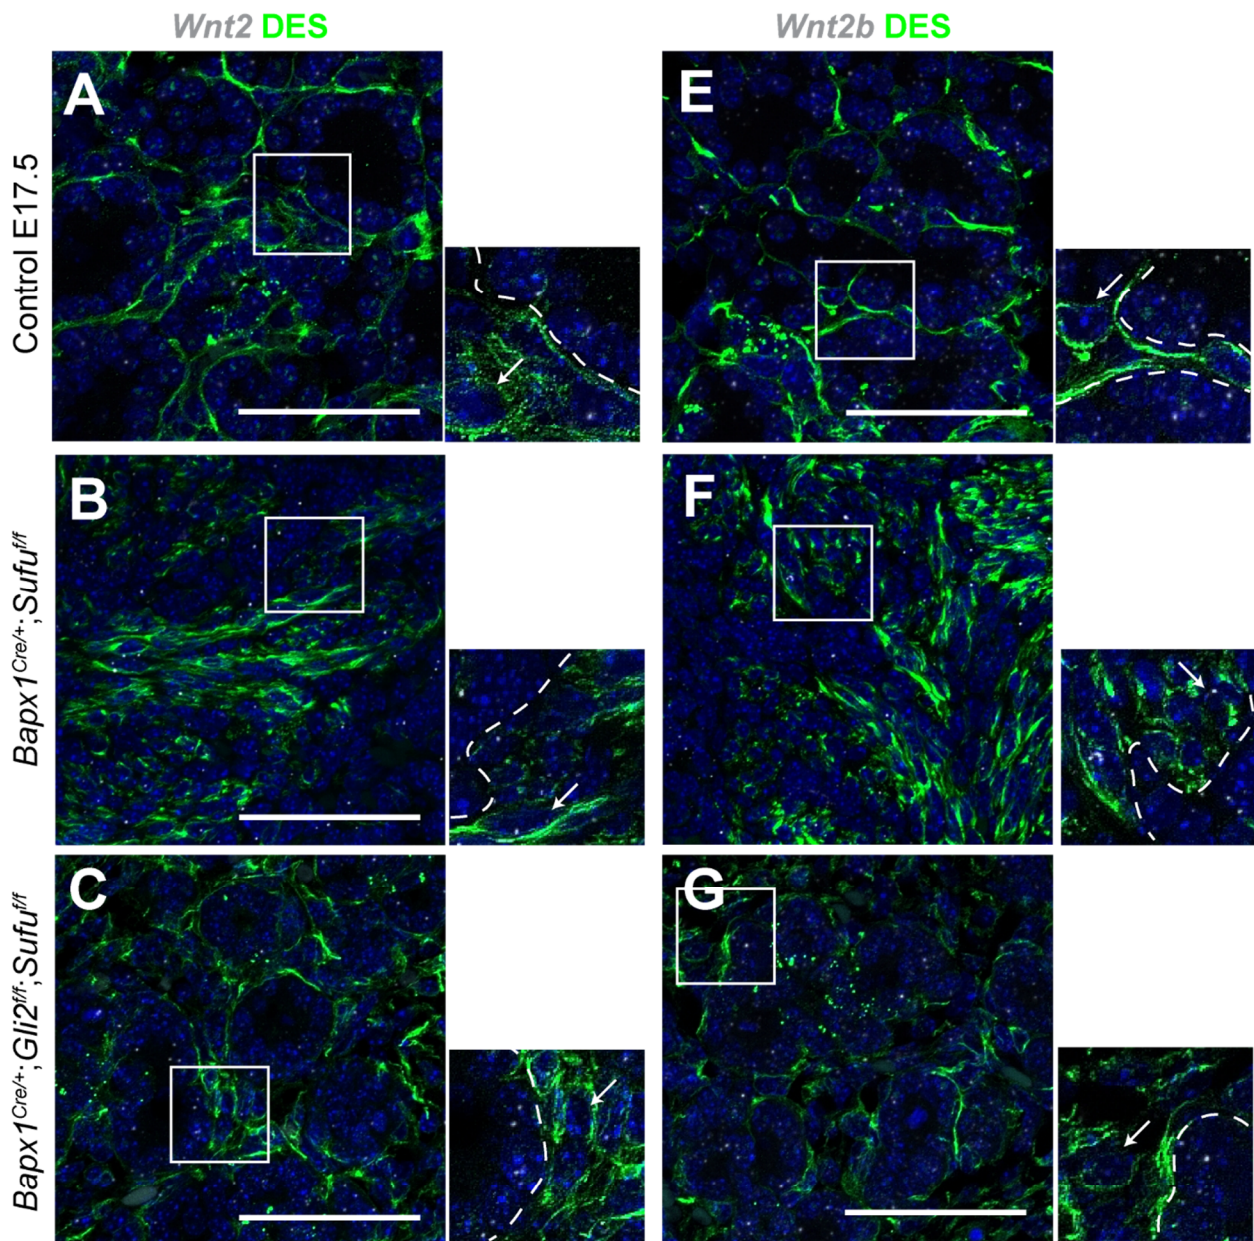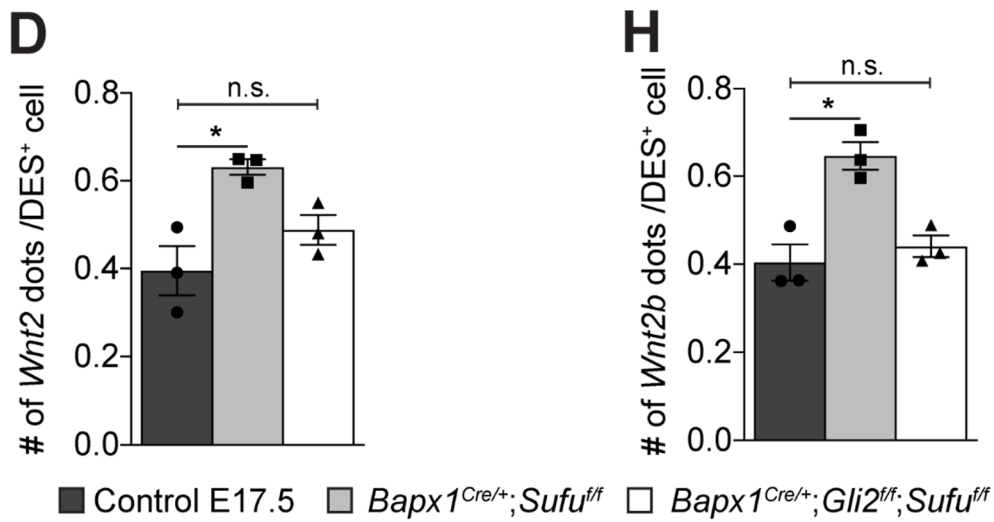

**Supplementary Figure 11.****Mesenchymal deletion of *Gli2* recovers Wnt ligand overexpression in *Bapx1<sup>Cre/+</sup>;Sufu<sup>ff</sup>* mutants.**

**A-C)** Representative single molecule fluorescent *in situ* hybridization (smFISH) images for Wnt ligand, *Wnt2*, in E17.5 control (A), *Bapx1<sup>Cre/+</sup>;Sufu<sup>ff</sup>* (B), and *Bapx1<sup>Cre/+</sup>;Gli2<sup>ff</sup>;Sufu<sup>ff</sup>* (C) pancreata co-stained with DES to mark mesenchymal cells. **D)** Quantification of smFISH dots per DES<sup>+</sup> mesenchymal cell for Wnt ligand, *Wnt2*, in E17.5 control, *Bapx1<sup>Cre/+</sup>;Sufu<sup>ff</sup>*, and *Bapx1<sup>Cre/+</sup>;Gli2<sup>ff</sup>;Sufu<sup>ff</sup>* embryos (n=3 samples per genotype). **E-G)** Representative smFISH images for Wnt ligand, *Wnt2b*, in E17.5 control (E), *Bapx1<sup>Cre/+</sup>;Sufu<sup>ff</sup>* (F), and *Bapx1<sup>Cre/+</sup>;Gli2<sup>ff</sup>;Sufu<sup>ff</sup>* (G) pancreata co-stained with DES. **H)** Quantification of smFISH dots per DES<sup>+</sup> mesenchymal cell for Wnt ligand, *Wnt2b*, in E17.5 control, *Bapx1<sup>Cre/+</sup>;Sufu<sup>ff</sup>*, and *Bapx1<sup>Cre/+</sup>;Gli2<sup>ff</sup>;Sufu<sup>ff</sup>* embryos (n=3 samples per genotype). White boxes correspond to zoomed-in panels. Dashed line separates DES<sup>-</sup> epithelium and DES<sup>+</sup> mesenchyme. Arrows indicate representative mesenchymal cells. Data are means ± SEM. n.s. denotes not significant, \* denotes p<0.05 by Student's un-paired t-test. Scale bars: 50 μm.

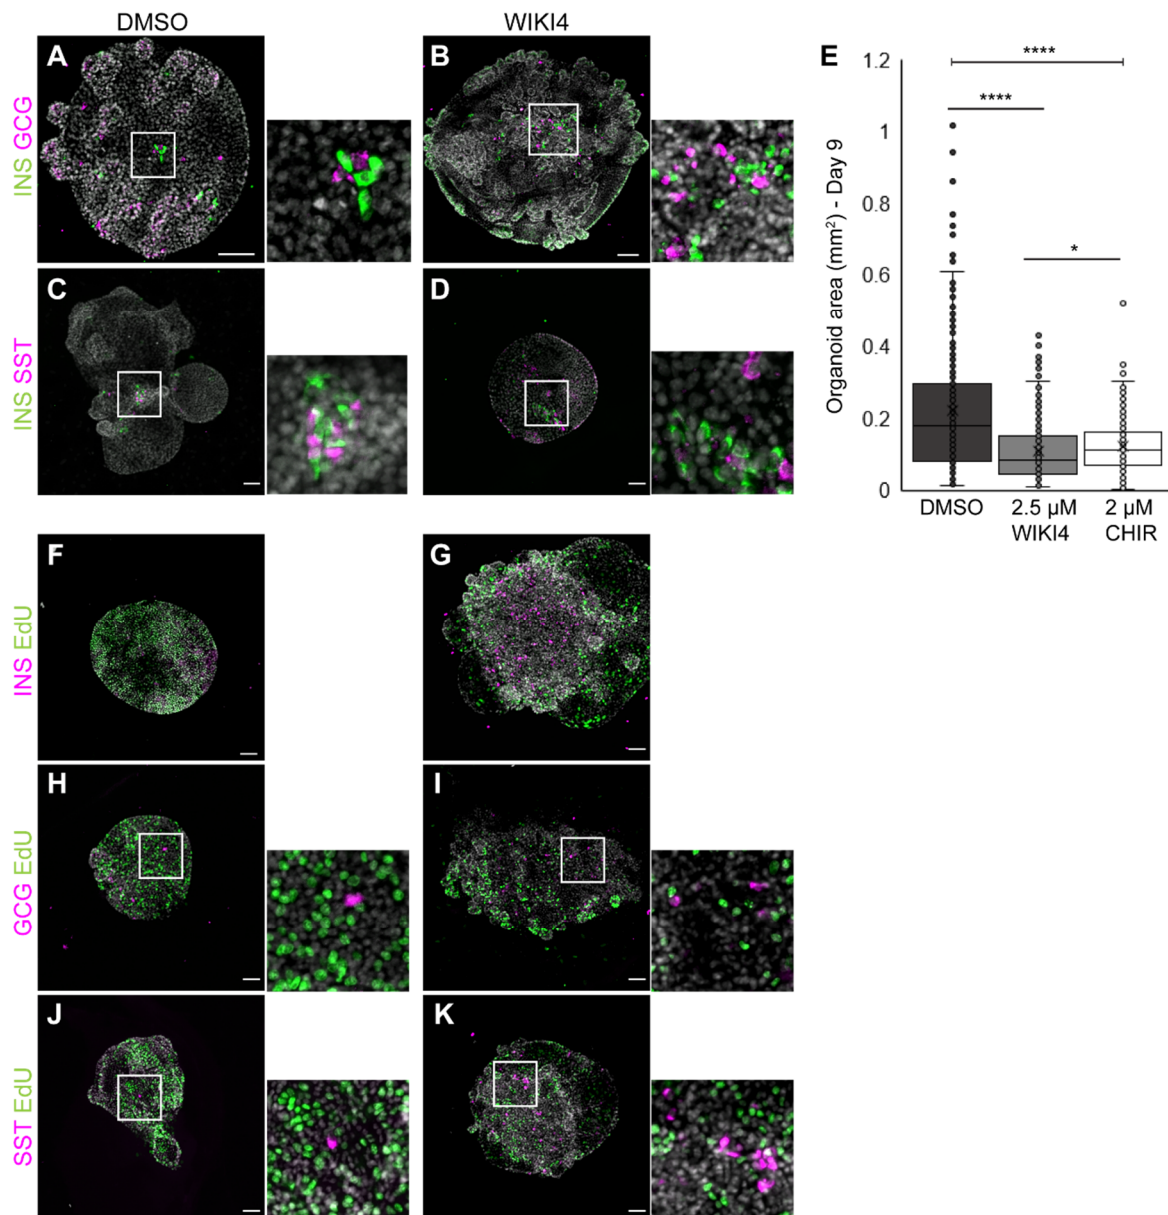

**Supplementary Figure 12.**

**Characterization of pancreatic epithelial organoids derived from in vivo pancreatic progenitors.** **A-B)** Representative immunostaining for GCG with INS in DMSO- (A) and WIKI4-treated organoids (B) at day 9 of culture. **C-D)** Representative immunostaining for SST with INS in DMSO- (C) and WIKI4-treated organoids (D) at day 9 of culture. **E)** Comparison of organoid area of DMSO (n=294), WIKI4 (n=326), and CHIR (n=504) treated organoids at day 9 of culture. Mid line of box denotes median, upper line denotes third quartile, lower line denotes first quartile. Whiskers indicate maximum (top) and minimum (bottom). \* denotes  $p < 0.05$ , \*\*\*\* denotes  $p < 0.00005$  by Student's un-paired t-test. **F-K)** Representative images of day 9 DMSO and WIKI4-treated organoids treated with 5-Chloro-2'-deoxyuridine (EdU) for 1 hour before harvest and co-stained with INS (F-G), GCG (H-I), and SST (J-K) to assess endocrine cell proliferation. White boxes correspond to zoomed-in panels. Scale bars: 100  $\mu\text{m}$ .

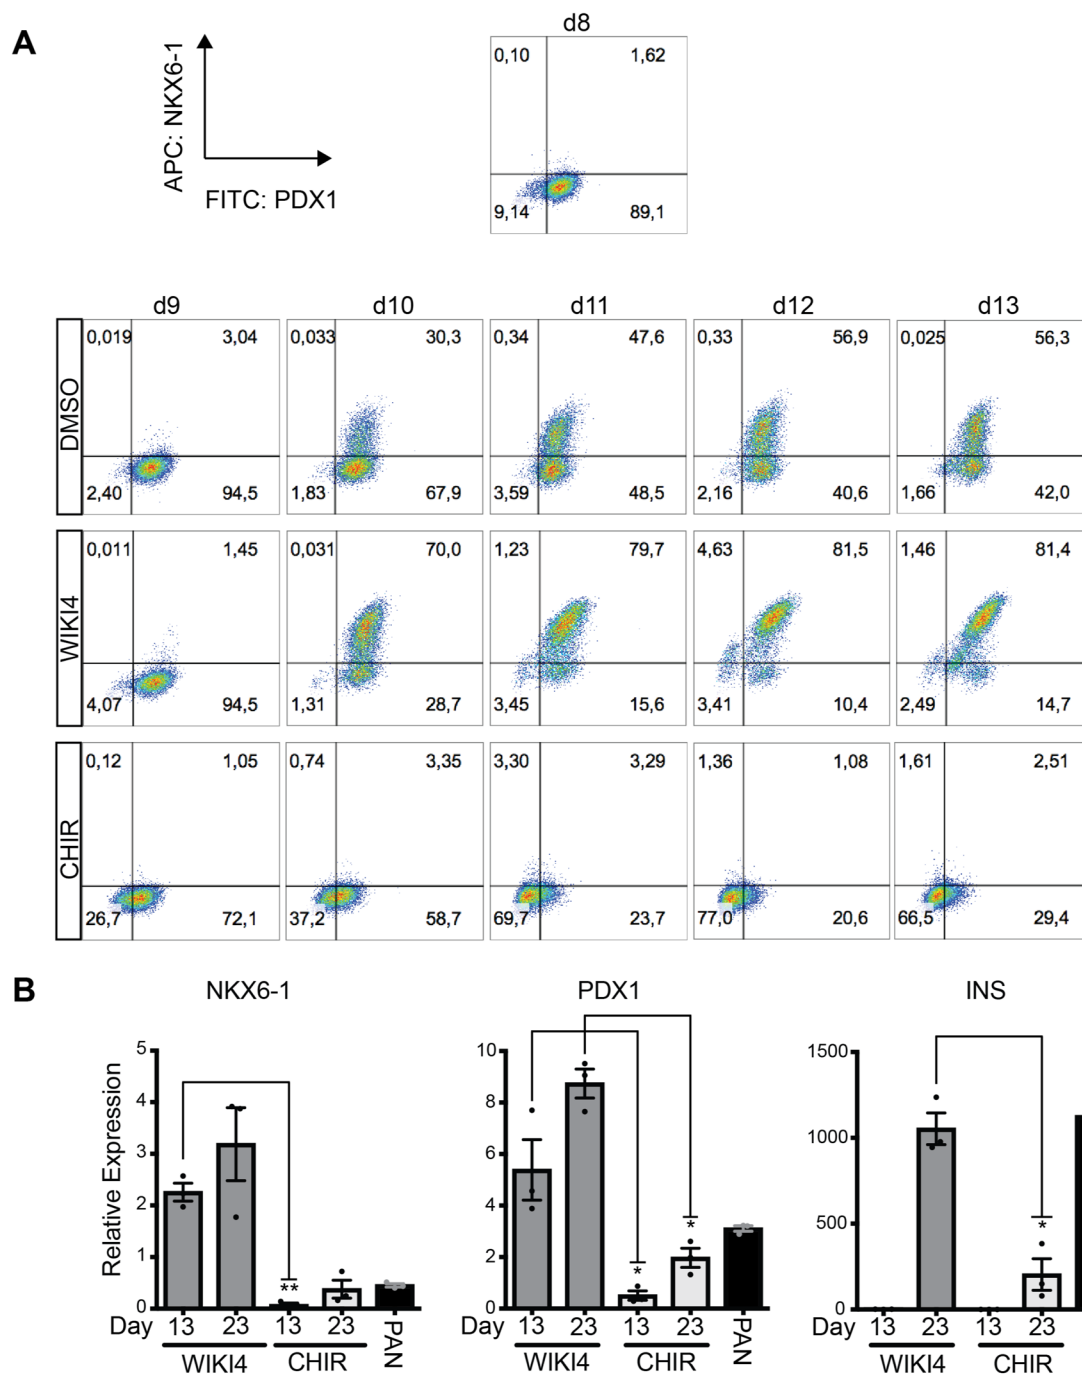

Supplementary Figure 13.

**Modulation of WNT signaling during human stem cell-derived pancreatic differentiation. A)** Representative flow cytometry plots from day 8 to day 13 of cultures differentiated with DMSO, WIKI4 or CHIR at stage 4. Cells were stained with anti-PDX1 and anti-NKX6-1. **B)** qPCR analysis of *NKX6-1*, *PDX1* and *INS* at days 13 and 23 of differentiation in the presence of WIKI4 or CHIR (n=3 independent experiments). Relative expression levels are normalized to housekeeping gene *TATA-binding protein (TBP)* and compared to adult pancreas. Data are means  $\pm$  SEM. \* denotes  $p < 0.05$ , \*\* denotes  $p < 0.01$  by Student's paired t-test.

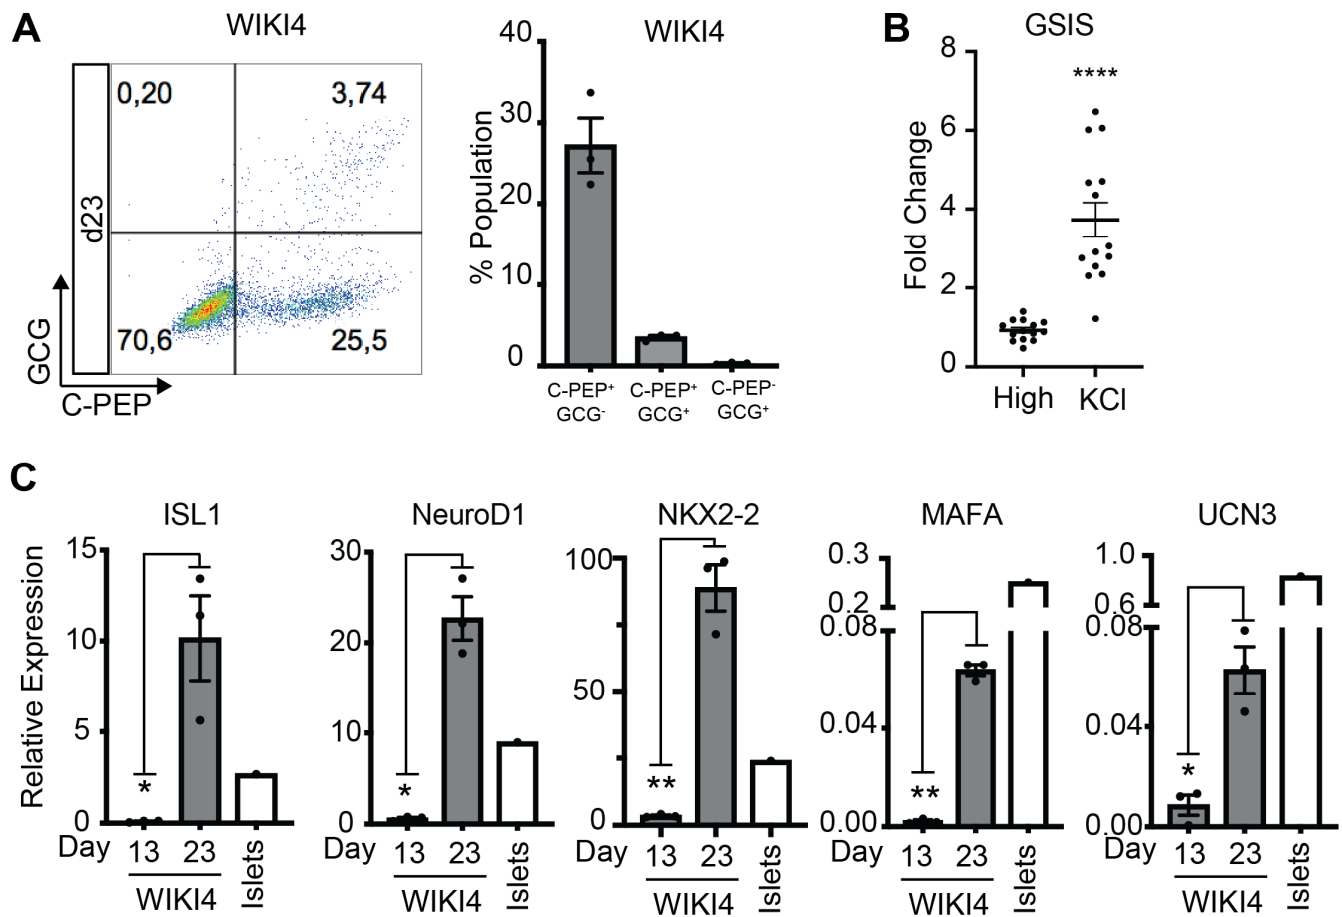

Supplementary Figure 14.

**Characterization of WIKI4-derived beta-like cell populations.** **A)** Representative flow cytometry plot of day 23 cultures differentiated with WIKI4 at stage 4. Cells were stained with anti-C-Peptide (C-PEP) and anti-Glucagon (GCG). Quantification of the percentage of C-PEP<sup>+</sup>/GCG<sup>-</sup>, C-PEP<sup>+</sup>/GCG<sup>+</sup> and C-PEP<sup>-</sup>/GCG<sup>+</sup> endocrine cells generated at day 23 of differentiation after treatment with WIKI4 (n=4 independent experiments). **B)** Glucose stimulated insulin secretion (GSIS) assay was performed at day 35/36 of differentiation. Data are presented as fold changes of insulin secreted after 16.7 mM glucose (high) and 25 mM KCl stimulation compared to secretion at 2.8 mM glucose (n=3 biological replicates, with 4-5 technical replicates). Data are means ± SEM. \*\*\*\* denotes p < 0.0001 by Student's paired t-test. **C)** Gene expression analyses of endocrine and beta cell markers (*ISL1*, *NeuroD1*, *NKX2-2*, *MAFA* and *UCN3*) in WIKI4-derived cells on day 13 and day 23 of differentiation (n=3 independent experiments). Relative expression levels are normalized to housekeeping gene *TATA-binding protein* (*TBP*) and compared to adult human islets. Data are means ± SEM. \* denotes p < 0.05, \*\* denotes p < 0.01 by Student's paired t-test.

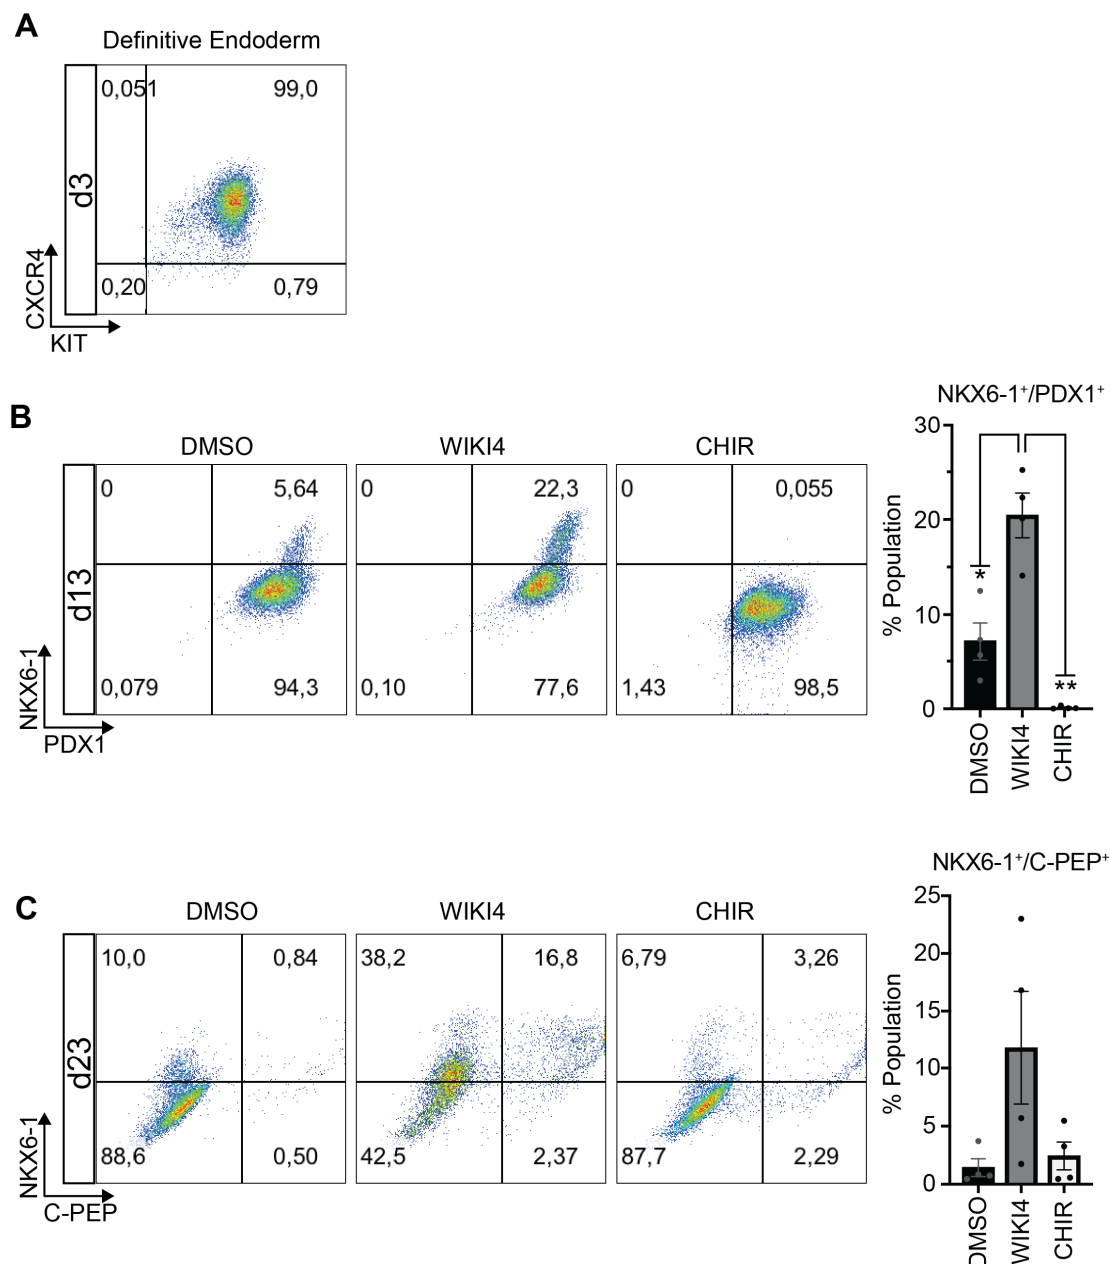

### Supplementary Figure 15.

**The effect of WNT inhibition in stem cell-derived pancreatic endoderm is not cell line specific.** A human induced pluripotent stem cell line, BJ-iPSC-1, was differentiated to pancreatic beta-like cells according to Figure 7A. **A)** Flow cytometry profile of CXCR4 and c-KIT to demonstrate efficient generation of definitive endoderm at day 3. **B)** Representative flow cytometry plot and quantification of the percentage of NKX6-1<sup>+</sup>/PDX1<sup>+</sup> cells generated at day 13 of differentiation, after treatment with DMSO, WIKI4 or CHIR at stage 4 of differentiation (n=4 independent experiments). Data are means ± SEM. \* denotes p<0.05, \*\* denotes p<0.01 by one-way ANOVA. **C)** Representative flow cytometry plot and quantification of the percentage of NKX6-1<sup>+</sup>/C-PEP<sup>+</sup> beta-like cells generated at day 23 of differentiation, after treatment with DMSO, WIKI4 or CHIR at stage 4 of differentiation (n=4 independent experiments). Data are means ± SEM. \* denotes p<0.05, \*\* denotes p<0.01 by one-way ANOVA.

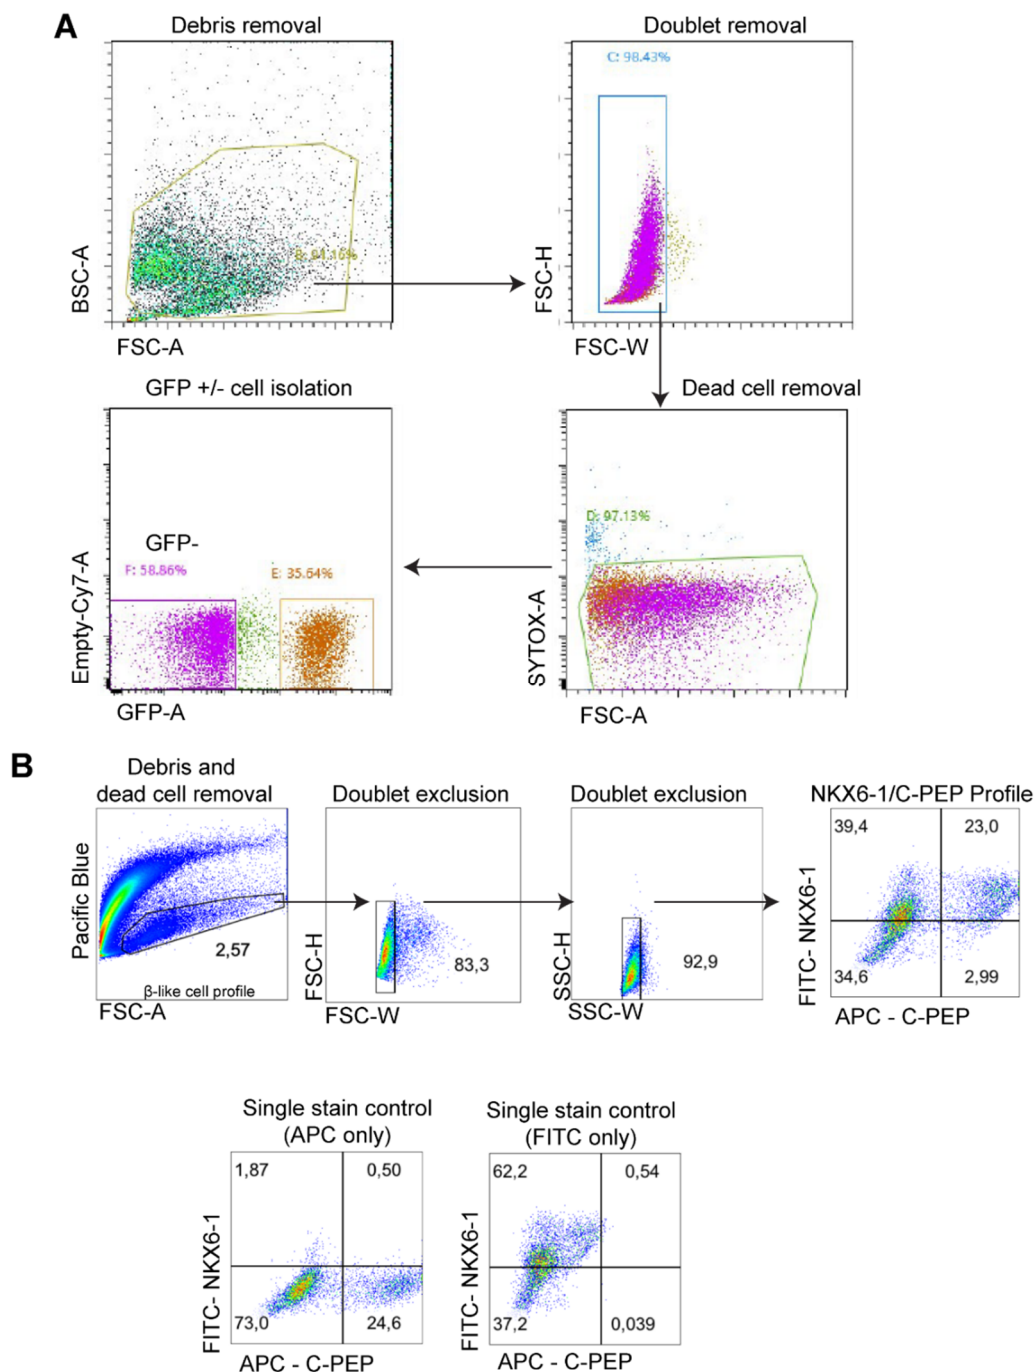

Supplementary Figure 16.

**Gating strategies used for cell sorting.** **A)** Gating strategy to sort GFP<sup>+</sup> mesenchyme and GFP<sup>-</sup> non-mesenchyme from *Bapx1*<sup>Cre/+</sup>;*ROSA26*<sup>mT/mG</sup> and *Bapx1*<sup>Cre/+</sup>;*ROSA26*<sup>mT/mG</sup>;*Sufu*<sup>fl/fl</sup>;*Spop*<sup>fl/fl</sup> embryonic guts for RNA-seq analysis in Fig. 1 and 5, qPCR in Fig. 2E and Supplementary Fig. 2E, and the FACs plots in Supplementary Fig. 1A and 3C,D. **B)** For hPSC studies, debris and dead cells were removed using zombie violet viability dye (Pacific Blue) versus FSC-A. Doublets were excluded using FSC-H versus FSC-W and then SSC-H versus SSC-W (Upper panels). Flow gate was set based on single stain (Lower panels). hPSC gating strategy was used to generate data in Fig. 7B-F, and Supplementary Fig. 13-15.

## Supplementary Reference

1. Sander, M. *et al.* Homeobox gene Nkx6.1 lies downstream of Nkx2.2 in the major pathway of beta-cell formation in the pancreas. *Development* **127**, 5533–40 (2000).
