# Supplementary material for: Sufu- and Spop-mediated downregulation of Hedgehog signaling promotes beta cell differentiation through organ-specific niche signals
Source: PubMed Central journal article supplement (PMC6789033; doi:10.1038/s41467-019-12624-5), 2019-10-11
Supplement: 41467_2019_12624_MOESM3_ESM.pdf [file 41467_2019_12624_MOESM3_ESM.pdf]

## Description of Additional Supplementary Files

**Supplementary Data 1:** Raw read counts for RNA-seq analysis of fluorescence-activated cell sorted E13.5 intestine, stomach, pancreas, and *Bapx1*<sup>Cre/+</sup>;*ROSA26*<sup>mT/mG</sup>;*Sufu*<sup>ff</sup>;*Spop*<sup>ff</sup> mutant pancreas mesenchyme.

**Supplementary Data 2:** FPKM values derived from RNA-seq raw read counts of fluorescence-activated cell sorted E13.5 intestine, stomach, pancreas, and *Bapx1*<sup>Cre/+</sup>;*ROSA26*<sup>mT/mG</sup>;*Sufu*<sup>ff</sup>;*Spop*<sup>ff</sup> mutant pancreas mesenchyme.

**Supplementary Data 3:** DESeq2 results table for differential gene analyses between intestine, stomach, and pancreas tissue pairs as well as control versus E13.5 *Bapx1*<sup>Cre/+</sup>;*ROSA26*<sup>mT/mG</sup>;*Sufu*<sup>ff</sup>;*Spop*<sup>ff</sup> pancreatic mesenchyme. Sheets described as follows:  
panc\_vs\_int\_deTab: Differential comparison between control pancreatic and intestinal mesenchyme. Positive fold change values indicate relative enrichment in pancreas. Negative values indicate relative enrichment in intestine.  
panc\_vs\_st\_deTab: Differential comparison between control pancreatic and stomach mesenchyme. Positive fold change values indicate relative enrichment in pancreas. Negative values indicate relative enrichment in stomach.  
st\_vs\_int\_deTab: Differential comparison between control stomach and intestinal mesenchyme. Positive fold change values indicate relative enrichment in stomach. Negative values indicate relative enrichment in intestine.  
panc\_vs\_pancMut\_deTab: Differential comparison between E13.5 control versus *Bapx1*<sup>Cre/+</sup>;*ROSA26*<sup>mT/mG</sup>;*Sufu*<sup>ff</sup>;*Spop*<sup>ff</sup> pancreatic mesenchyme. Positive fold change values indicate relative enrichment in control pancreatic mesenchyme. Negative values indicate relative enrichment in mutant pancreatic mesenchyme.

**Supplementary Data 4:** gProfilerR output of GO enrichment analysis in Generic Enrichment Map (GEM) format, used as input for generating enrichment maps in Fig. 1D.
